# Supplementary material for: A scalable approach using a gC3N4-covalent organic framework hybrid catalyst towards sustainable hydrogen production from seawater and wastewater
Source: Royal Society of Chemistry journal article supplement (doi:10.1039/d4sc01387e), 2024-01-01
Supplement: d4sc01387e1.pdf [file d4sc01387e1.pdf]

## Supporting information

### **A Scalable Approach Using gC<sub>3</sub>N<sub>4</sub>-Covalent Organic Framework Hybrid Catalyst Towards Sustainable Hydrogen Production from Seawater and Wastewater**

Kiran Asokan,<sup>a,b</sup> T. M. Bhagyasree,<sup>a,b</sup> George Devasia,<sup>b,c</sup> Sailaja Krishnamurthy,<sup>b,c</sup> Sabah Solim,<sup>d</sup> Lina Rueda,<sup>d</sup> Dhabia M. Al-Mohannadi,<sup>e</sup> Mohammed Al-Hashimi,<sup>e</sup> Konstantinos Kakosimos,<sup>e</sup> and Sukumaran Santhosh Babu<sup>\*,a,b</sup>

<sup>a</sup>Organic Chemistry Division, National Chemical Laboratory (CSIR-NCL), Dr. Homi Bhabha Road, Pune-411008, India

<sup>b</sup>Academy of Scientific and Innovative Research (AcSIR), Ghaziabad-201 002, India

<sup>c</sup>Physical and Materials Chemistry Division, National Chemical Laboratory (CSIR-NCL), Dr. Homi Bhabha Road, Pune-411008, India

<sup>d</sup>Qatar Shell Research & Technology Centre, Qatar Science & Technology Park, Education City, Doha, Qatar

<sup>e</sup>Chemical Engineering Department, Texas A&M University at Qatar, Doha, Qatar

\*Correspondence: [sb.sukumaran@ncl.res.in](mailto:sb.sukumaran@ncl.res.in)

## Table of Contents

|                                                                              |     |
|------------------------------------------------------------------------------|-----|
| i. Materials and methods.....                                                | S3  |
| ii. Experimental Procedure for Photocatalytic Activity Measurements.....     | S4  |
| iii. Photoelectrochemical measurements.....                                  | S5  |
| iv. Synthesis and characterizations.....                                     | S5  |
| v. Fourier-transform infrared spectroscopy .....                             | S9  |
| vi. Solid state <sup>13</sup> C cross-polarization magic angle spinning..... | S10 |
| vii. Powder X-ray diffraction pattern.....                                   | S11 |
| viii. Thermogravimetric analysis.....                                        | S12 |
| ix. X-ray photoelectron spectroscopy.....                                    | S13 |
| x. Scanning electron and transmission electron microscopy.....               | S14 |
| xi. BET and pore size analysis.....                                          | S21 |
| xii. UV-Vis diffuse reflectance spectroscopy and tacu plot.....              | S24 |
| xiii. Mott-Schottky measurements.....                                        | S25 |
| xiv. Photocatalytic hydrogen evolution experiments.....                      | S26 |
| xv. Post characterization of the catalyst after cyclic study.....            | S28 |
| xvi. Photophysical studies of catalyst.....                                  | S31 |
| xvii. Ultraviolet photoelectron spectroscopy studies.....                    | S34 |
| xviii. Bulk scale synthesis and characterization.....                        | S36 |
| xix. Tables.....                                                             | S39 |
| xx. References.....                                                          | S45 |

## Materials and Methods

1,3,5-Triformyl phloroglucinol (**Tp**) was purchased from Hygeia laboratories, Pune, India. *p*-Phenylene diamine (**Pa**) and *p*-toluenesulfonic acid (PTSA) were purchased from Tokyo Chemical Industry, India. Deionized water, methanol, and dichloromethane were used for washing COF. Synthesized COFs were characterized with Fourier transform infrared spectroscopy (FT-IR) in KBr mode using a Bruker Alpha-E Infrared spectrophotometer, and the wavenumbers of the recorded IR signals are quoted in  $\text{cm}^{-1}$ . Wide-angle X-ray diffraction (WAXD) analysis was recorded on a Rigaku MicroMax-007HF equipped with a high-intensity microfocus rotating anode X-ray generator. The data were collected with the help of Control Win software. A Rigaku, R-axis IV++ detector was used for the wide-angle experiments using Cu K-alpha ( $1.54 \text{ \AA}$ ) radiation outfitted with a Ni filter, and an aluminum holder was used as the sample holder. Thermogravimetric analysis (TGA) of the samples was carried out in a PerkinElmer STA 600 analyser in a  $\text{N}_2$  atmosphere by maintaining a temperature ramp between room temperature and  $900 \text{ }^\circ\text{C}$  with a heating rate of  $10 \text{ }^\circ\text{C min}^{-1}$ . Prior to analysis, samples were activated at  $100 \text{ }^\circ\text{C}$  to remove solvents and moisture trapped in pores. BET adsorption experiments (up to 1 bar) of COF samples were performed on a Quantachrome Quadrasorb/Autosorb automatic volumetric instrument. Prior to surface area analysis, the samples were activated at  $130 \text{ }^\circ\text{C}$  for 24 hours. The porosity of the samples was measured by  $\text{N}_2$  adsorption of an activated sample at 77 K. The average pore diameter of the samples was calculated by nonlocal density functional theory (NLDFT). The Brunauer–Emmett–Teller (BET) surface area of the samples was determined by multipoint BET analysis. The photocatalytic experiments were carried out using a Holmarc solar simulator, and the quantification of  $\text{H}_2$  gas was performed using a NUCON gas chromatograph 5700 model.

All the DFT calculations were performed under periodic boundary conditions using Vienna ab initio Simulation Package (VASP).<sup>S1</sup> The generalized gradient approximation (GGA) employed with Perdew-Burke-Ernzerhof (PBE)<sup>S2</sup> was used as an exchange correlation function. The projector augmented wave (PAW) method was used to describe ion-electron interactions. The kinetic energy cutoff was set to 400 eV. DFT-D3 method of Grimme was incorporated to take into account of long-range van der Waals (vdW) interactions.<sup>S3</sup> A vacuum space of  $20 \text{ \AA}$  along Z axis was selected to avoid unwanted interactions with a Monkhorst Pack k-point grid of  $1 \times 1 \times 1$ . The convergence criteria for energy were set to be  $10^{-6} \text{ eV}$  and optimization was carried out until the forces converged to  $0.005 \text{ eV \AA}^{-1}$ .

## I. Experimental Procedure for Photocatalytic HER Experiments

Photocatalytic HER experiments were carried out under steady-state conditions by headspace analysis at room temperature (25 °C). The catalyst was dispersed in water with SED by sonication for 30 min, and subsequently, Argon gas was bubbled for 30 min to remove any dissolved oxygen. During the reaction, the entire suspension is stirred by using a magnetic stirrer. In general, 5 mg of the photocatalyst was suspended in an airtight quartz round bottom flask (closed with a silicone rubber septum) of 50 mL capacity containing 20 mL distilled water and 200 mg ascorbic acid. The reaction's progress was monitored by illuminating various visible light sources such as solar simulator, and sunlight. The reactor's headspace was periodically sampled with an offline injection system by a gas phase syringe having an injection volume of 500  $\mu$ L. The gas analysis was carried out by regular sampling every hour, and a gas chromatograph (GC) equipped with a TCD detector (Nucon engineers) was employed for quantitative analysis. After a saturation regime in the first cycle, the photocatalyst suspension is purged with Ar for 30 min before starting the next cycle, and for repeated experiments, the catalyst is filtered after each photocatalytic cycle, washed with excess water and methanol, and dried under vacuum.

The photocatalytic experiments were carried out using Holmarc made solar simulator and quantification of H<sub>2</sub> gas was done using NUCON gas chromatograph 5700 model.

Stability tests for photocatalysts: At first, the weight loss of the catalyst after each photocatalytic reaction cycle is checked, and found negligible mass loss or gain. The decomposition of the catalyst under reaction conditions for a long time was also tested, and no other gases, except H<sub>2</sub> could be detected by GC. The structural stability of the catalyst over time is monitored by FT-IR and solid-state HR-TEM, and XPS analysis. The consistency in the rate of H<sub>2</sub> evolution is closely monitored with repeated cyclic experiments over 5 cycles.

The AQY of catalyst were calculated using irradiation under monochromatic light sources of different wavelength. For this 450, 500 and 550 nm were chosen and calculated using the following equations.

$$AQY = \frac{\text{Amount of product obtained}}{\text{number of incident photons}} \times 100$$

$$= \frac{n_p \times N_A \times n \times h \times c}{P \times S \times \lambda} \times 100$$

Where,  $n_p$  is the  $H_2$  evolution rate ( $\text{mol s}^{-1}$ ),  $N_A$  is Avogadro constant ( $6.022 \times 10^{23} \text{ mol}^{-1}$ ),  $n$  is number of transferred electrons in hydrogen evolution reaction (2),  $h$  is the Planck constant ( $6.626 \times 10^{-34} \text{ J}\cdot\text{s}$ ),  $c$  is the speed of light ( $3 \times 10^8 \text{ m}\cdot\text{s}^{-1}$ ),  $P$  is the intensity of irradiation light ( $\text{W}\cdot\text{m}^{-2}$ ),  $S$  is the irradiation area ( $\text{m}^2$ ),  $\lambda$  is the wavelength of the monochromatic light (m).

## II. Photoelectrochemical Experiments

Electrochemical impedance spectroscopy (EIS) measurements were carried out in a CH electrochemical workstation in a standard three-electrode electrochemical cell with working electrode as catalyst coated FTO plate, a platinum plate as the counter electrode, and a saturated Ag/AgCl electrode as the reference electrode. A sodium sulfate solution (0.2 M) was used as the electrolyte. Preparation of the working electrode: 2 mg of catalyst powder was mixed with 1.0 mL ethanol and 10  $\mu\text{L}$  Nafion D-520 dispersion solutions (5.0 %) and sonicated for 30 minutes. The resulting mixture was deposited evenly on the bottom  $1 \times 1 \text{ cm}^2$  area of the FTO glass plate conducting surface (confirmed by digital multimeter) and left in the air to dry.

Photocurrent-time (I-T) measurement: Current measured in chronoamperometry mode in a fixed potential of 0.9 V, FTO electrode mounted approximately  $45^\circ$  angle closer to the counter electrode, a visible light irradiation solar simulator (AM 1.5G,  $100 \text{ mW cm}^{-2}$ ).

Transmission Electron Microscope (TEM): The samples for TEM were prepared by drop-casting the 2D polymer dispersions in the EtOH on a carbon-coated Cu grid and allowed to dry overnight in desiccators.

## III. Synthesis and Characterization

### Synthesis of PVP-Pt NPs.

Polyvinylpyrrolidone-coated Pt nanoparticles (PVP-Pt NPs) were synthesized according to the reported literature.<sup>S4</sup> In a typical procedure, 5.36g of 0.4 wt%  $H_2PtCl_6$  aqueous solution was added to a 15 mL beaker. To that, 3 mL of 0.442 g/mL PVP (MW 30,000) was diluted with 9 mL of deionized water and added to the beaker. Further, Sodium borohydride solution was

used to reduce Pt (IV) into metallic nanosize Pt particles. 0.1 g of NaBH<sub>4</sub> was dissolved in 50 mL water and the solution was added dropwise to a solution consisting of H<sub>2</sub>PtCl<sub>6</sub> and PVP. The amount of sodium borohydride required was monitored by a UV-visible spectrometer until all the Pt (IV) ions were reduced to platinum metal. With the addition of sodium borohydride, the H<sub>2</sub>PtCl<sub>6</sub> peak at 270 nm gradually disappears, indicative of a complete reduction of Pt (IV). The pH of the solution was adjusted to 5.300 by adding ammonium sulfite. The resulting polymer-stabilized solution had a dark brown color. HR-TEM images of synthesized NPs were analyzed and found to be spherical in shape with a diameter of 2-4 nm.

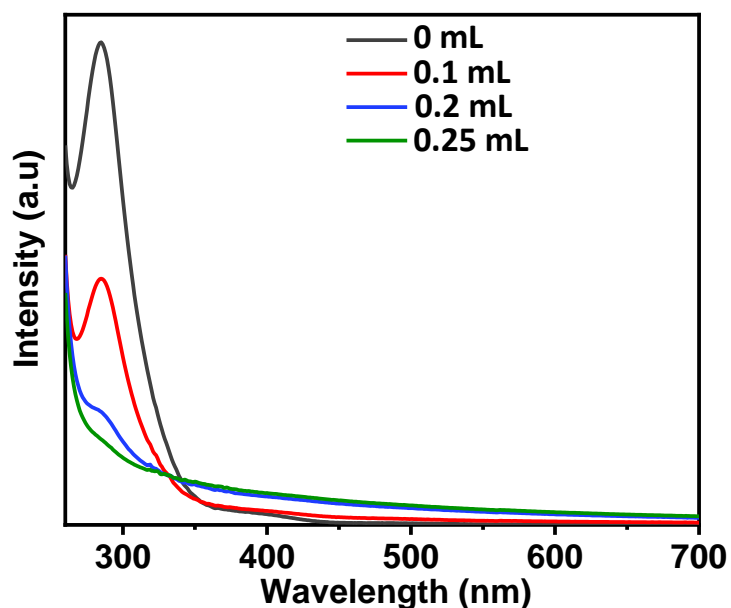

UV-visible absorption spectra of PVP-coated Pt nanoparticles with the addition of reducing agent NaBH<sub>4</sub>. Complete quenching of the peak was observed after adding 0.25 mL of NaBH<sub>4</sub>.

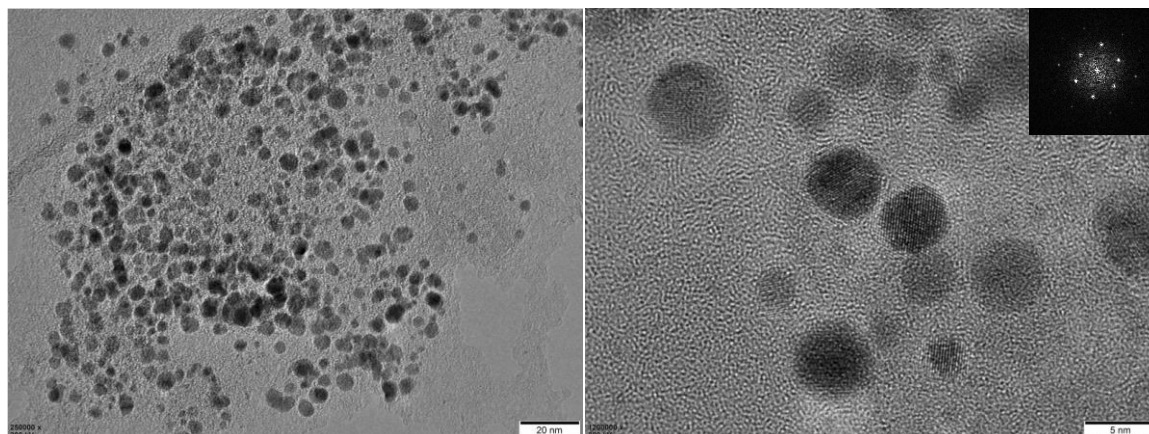

HR-TEM images of **PVP-Pt** nanoparticles synthesized.

## Synthesis of $\text{gC}_3\text{N}_4$

$\text{gC}_3\text{N}_4$  was synthesized, as reported earlier, from a urea precursor.<sup>S5</sup> In a typical procedure, 30 g of urea was taken in a silica crucible and appropriately covered with a lid. It was then heated at 600 °C for 4 hours at 5 °C/min ramping and then allowed to cool slowly. After cooling to room temperature, it was washed with deionized water, 1 N HCl, and ethanol and dried in a vacuum oven at 100 °C for 12 hours

## Synthesis of TPG-xs

The synthesis of **TPG-xs** was achieved by the mechanochemical method. In general, PTSA (2.5 mmol, 8 eq.) and **Pa** (0.45 mmol, 1.5 eq.) were ground thoroughly for 10-15 minutes. To that, **Tp** (0.3 mmol, 1 eq.) was added and ground into the mixture, followed by the addition of 50-100  $\mu\text{L}$  water (depending upon the requirement for making the mixture like a paste or jelly kind of material). The grinding was continued for 20 minutes. To the paste, different weight percentages of  $\text{gC}_3\text{N}_4$  ( $x = 10, 25, 50, 75, 100$ , where  $x$  is the weight percentage of  $\text{gC}_3\text{N}_4$  to the total quantity of **Tp** and **Pa**) were added and ground for 10-15 minutes. The resulting powder was transferred to a glass vial, closed, and heated at 90 °C for 12 hours. It was then washed using the Soxhlet apparatus with water, methanol, and  $\text{CH}_2\text{Cl}_2$ . The final product was dried in a vacuum oven at 120 °C for 12 hours.

## Synthesis of TPG-75

The synthesis of **TPG-75** was performed by the following procedure. 6.6 g of PTSA and 772 mg **Pa** were ground using a mortar pestle for 10 minutes until it became a homogenous mixture. To that, 1 g of **Tp** was added and ground again for 10 minutes. After ensuring a homogenous mixture formation, 100  $\mu\text{L}$  of  $\text{H}_2\text{O}$  was added and ground again for 10 minutes. To the paste, 1.32 g of  $\text{gC}_3\text{N}_4$  was added and again ground for 10 minutes. Finally, the mixture obtained was transferred into a glass vial and heated at 90 °C for 12 hours followed by Soxhlet washing using  $\text{H}_2\text{O}$ , Methanol. and dichloromethane. After washing the powder was dried in a vacuum oven at 120 °C for 12 hours yielding 2.8 g (92 % yield).

### Bulk Scale Synthesis of TPG-75-20G

The bulk-scale synthesis of **TPG-75** was performed by using a planetary mixer (Scheme S1, Table S1). Firstly, **Pa** and PTSA were taken in a container and mixed in a planetary mixer for 10 minutes at 1500 rpm. Later, **Tp** was added and again mixed for 10 minutes at the same rpm. After proper mixing of starting materials was confirmed, H<sub>2</sub>O was added and mixed at a lower rpm (1000) to ensure homogenous mixing for 10 minutes. To that, **gC<sub>3</sub>N<sub>4</sub>** and H<sub>2</sub>O were added and mixed again for 10 minutes at 1000 rpm. Finally, H<sub>2</sub>O was again added, and mixed the whole mixture at 1500 rpm for 10 minutes. The mixture was transferred into a petri dish and heated at 90 °C for 12 hours. The resultant mixture was washed and dried as mentioned earlier. 20 g, 92 % yield.

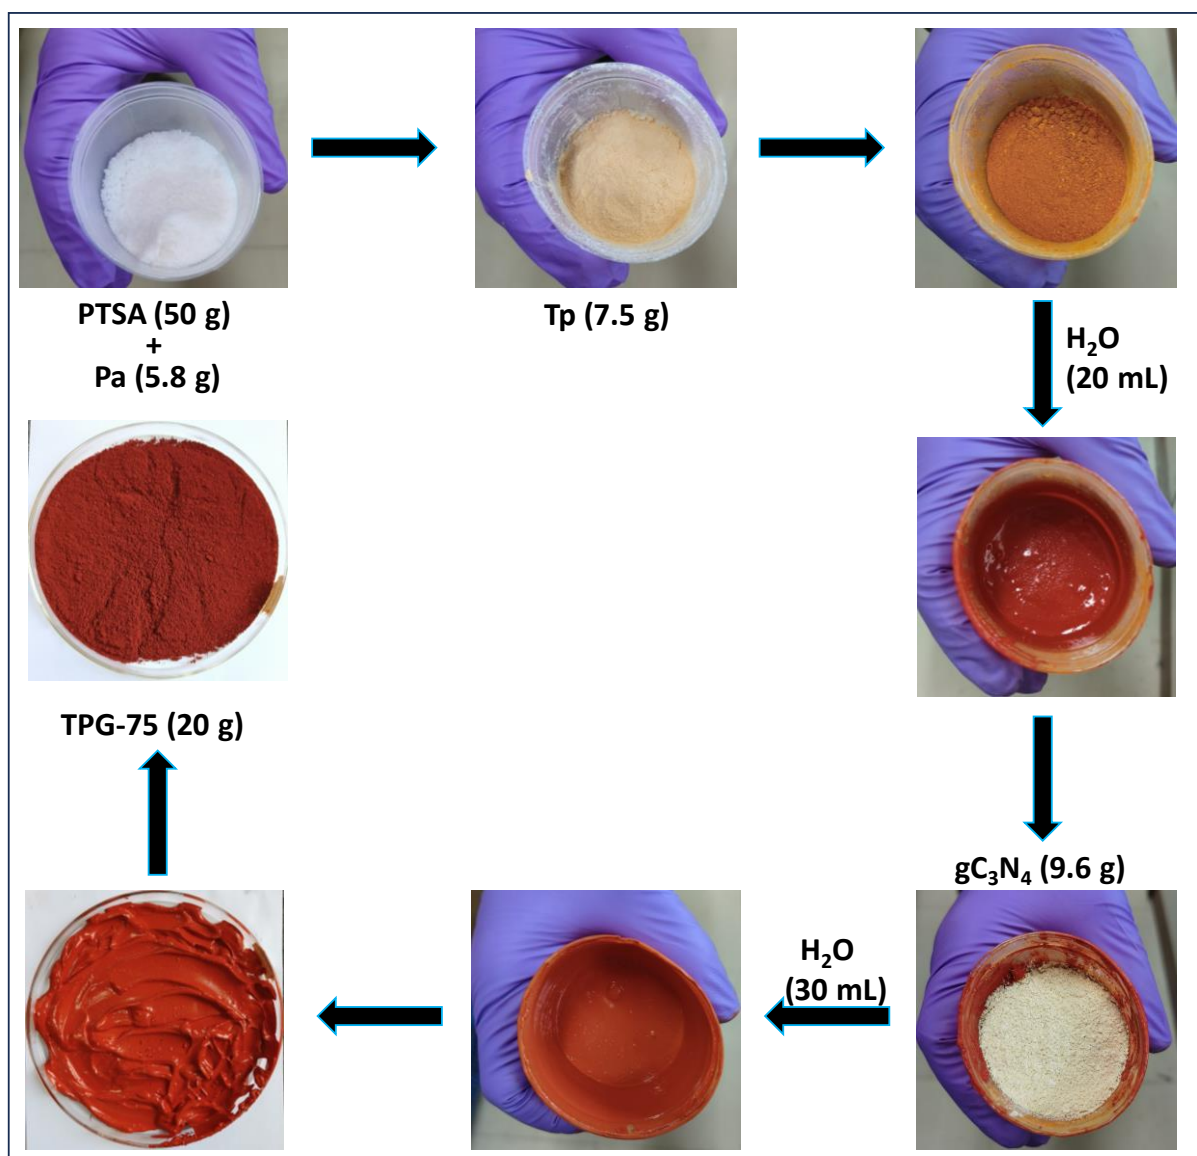

**Scheme S1.** The bulk scale synthesis scheme of **TPG-75-20G** using the planetary mixer.



## Figures and Tables

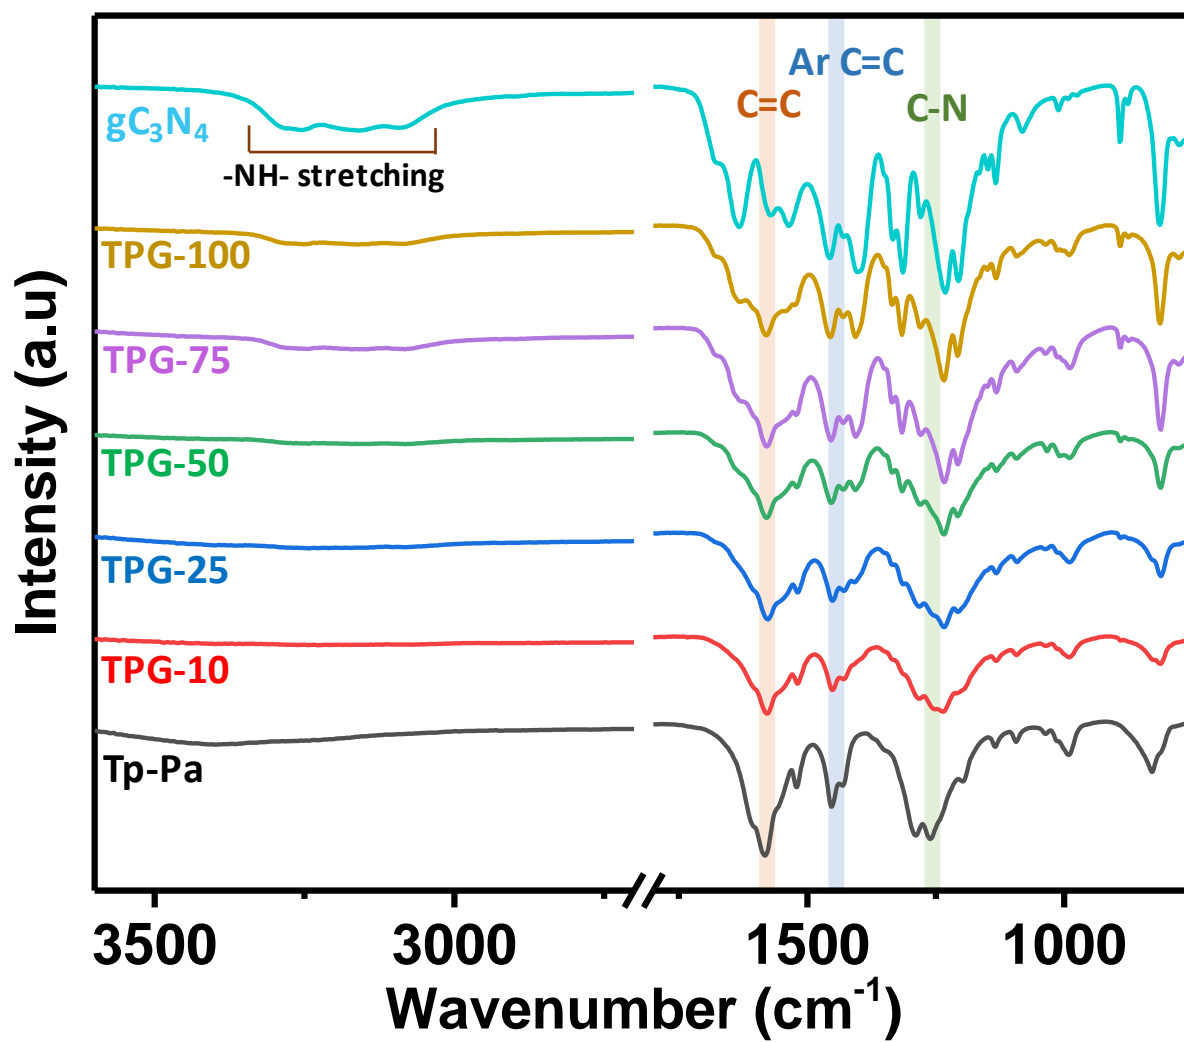

Figure S1. FT-IR spectrum of Tp-Pa, gC<sub>3</sub>N<sub>4</sub> and TPG-75.

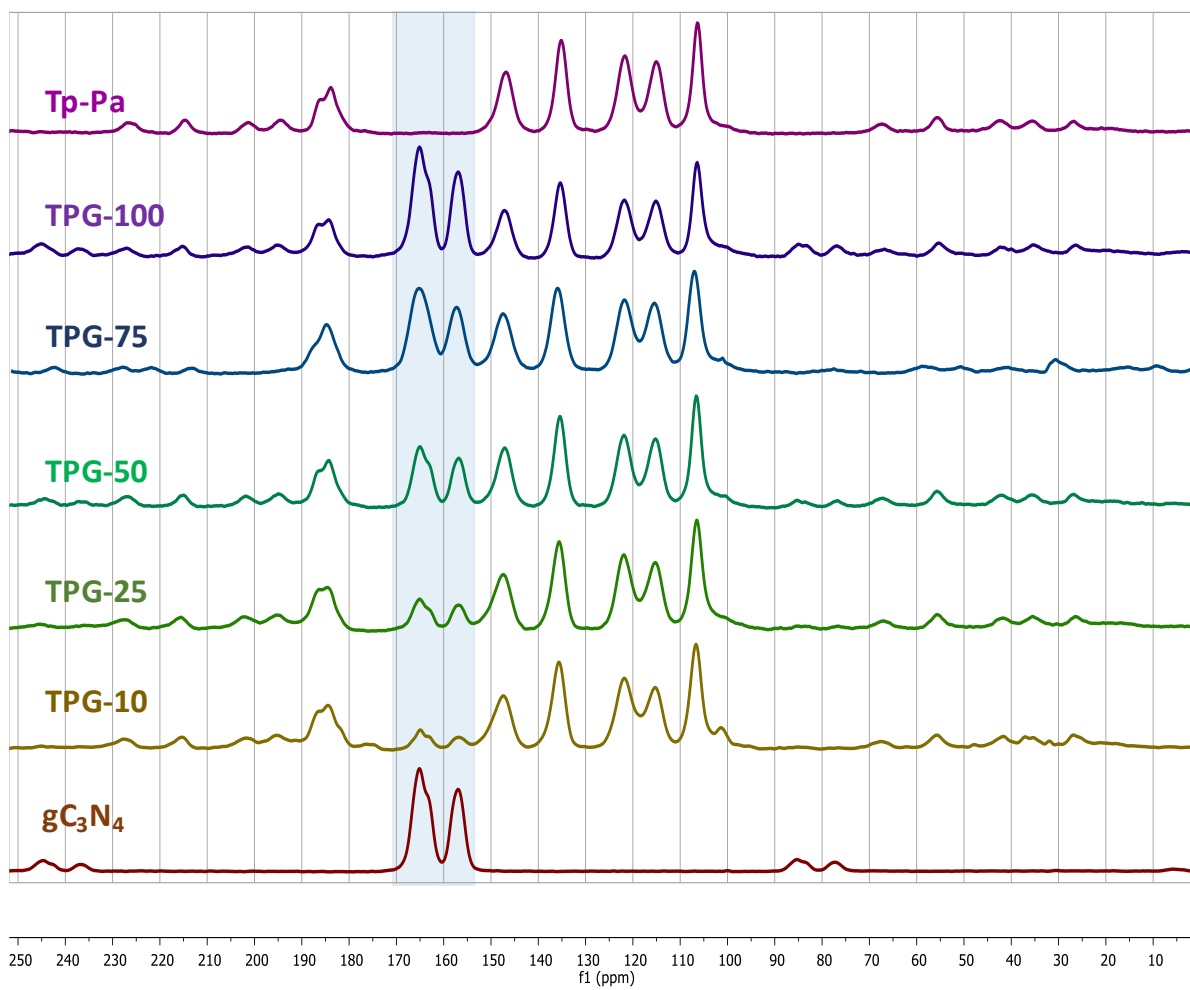

**Figure S2.** Solid state  $^{13}\text{C}$  CP MAS spectra of **Tp-Pa**,  **$\text{gC}_3\text{N}_4$** , and **TPGs**.

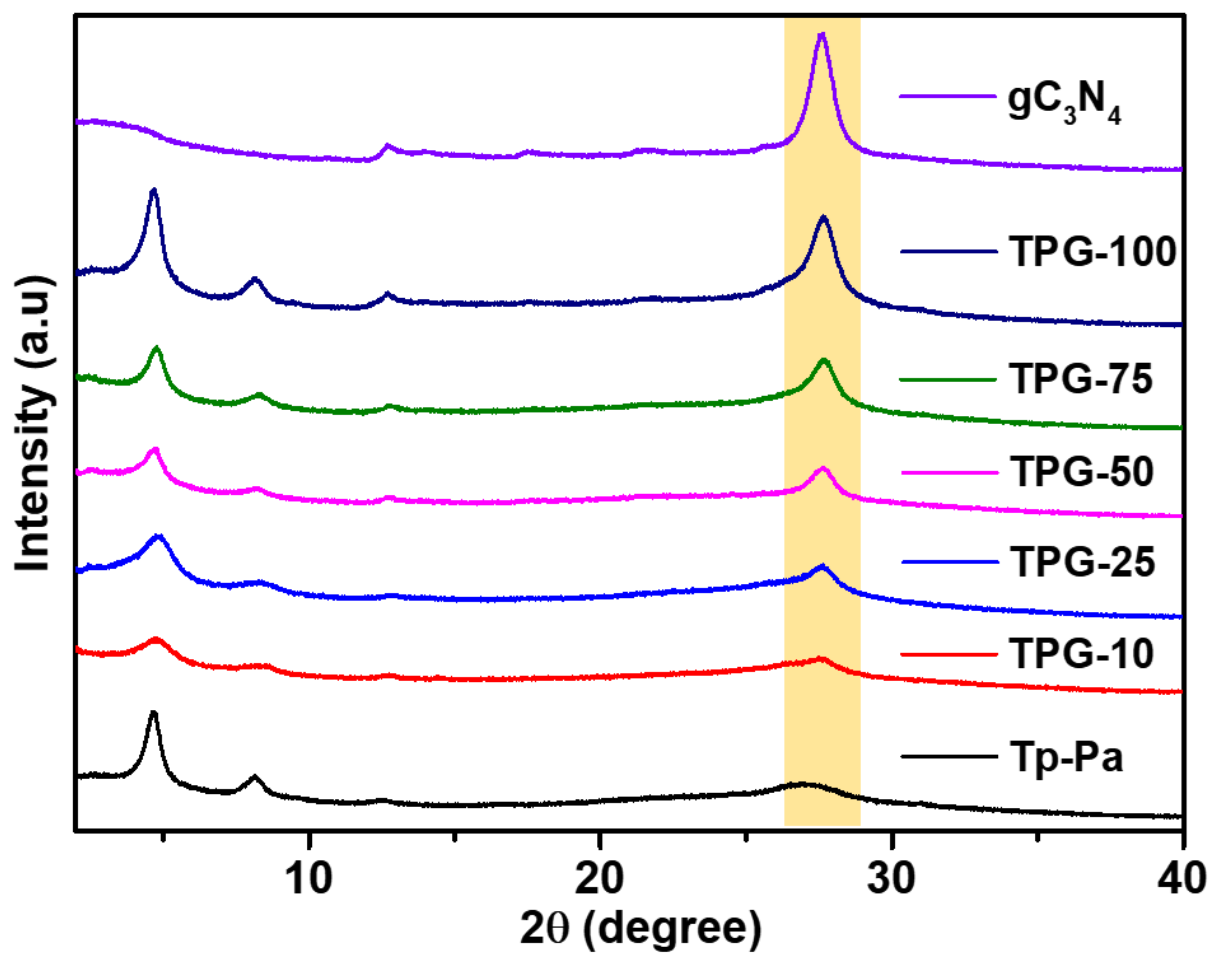

Figure S3. PXRD pattern of Tp-Pa, gC<sub>3</sub>N<sub>4</sub> and TPGs.

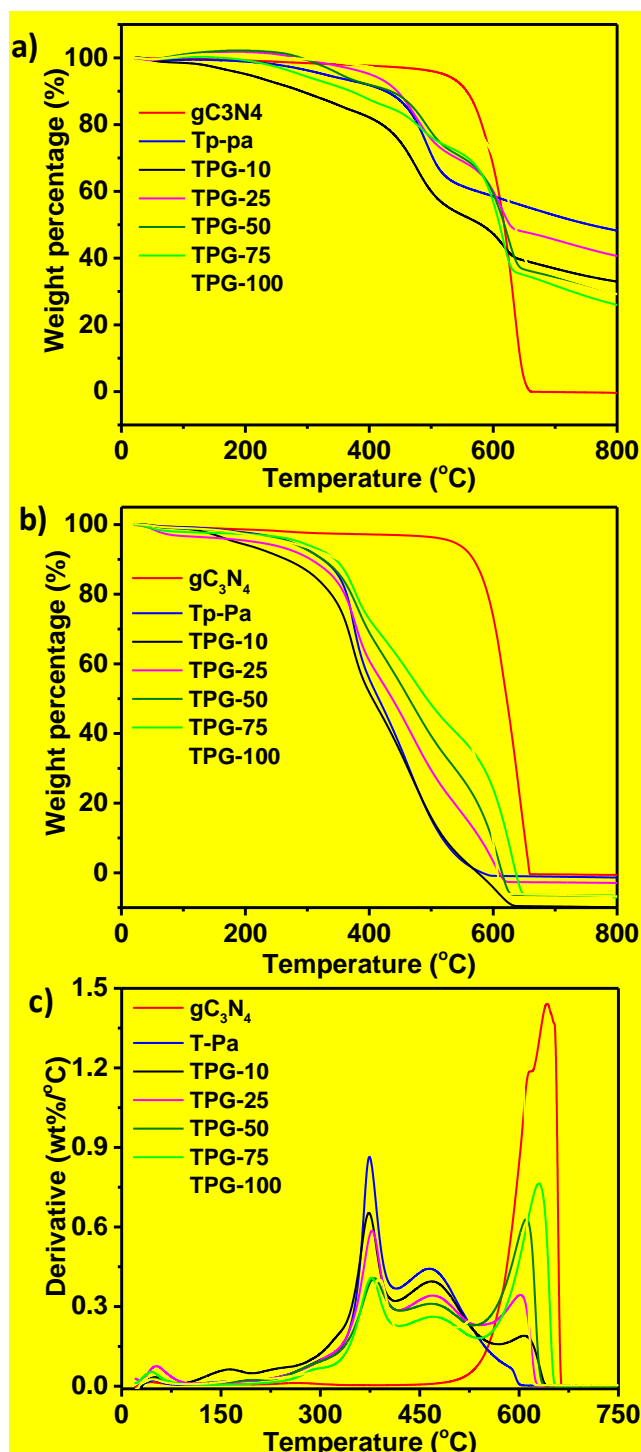

**Figure S4.** Thermogravimetric analysis of **Tp-Pa**, **gC<sub>3</sub>N<sub>4</sub>** and **TPGs**, a) under N<sub>2</sub>, b) under air along with the corresponding c) DTA curve.

The decomposition of all samples in the presence of air was also studied. It has been found that increasing the amount of **gC<sub>3</sub>N<sub>4</sub>** in **TPGs** increases the degradation temperature. The DTA curve shows two decomposition points, one for **Tp-Pa** occurring after 400 °C, and another one at around 600 °C for **gC<sub>3</sub>N<sub>4</sub>**. From the DTA curve, the percentage of **gC<sub>3</sub>N<sub>4</sub>** relative to **Tp-Pa** in the **TPG-x** was calculated and found to be 12.96%, 26.09%, 51.89%, 80.98%, and 106% for **TPG-10**, **TPG-25**, **TPG-50**, **TPG-75**, and **TPG-100**, respectively. The discrepancy in amount of **gC<sub>3</sub>N<sub>4</sub>** might be due to the amount of sample used for analysing TGA.

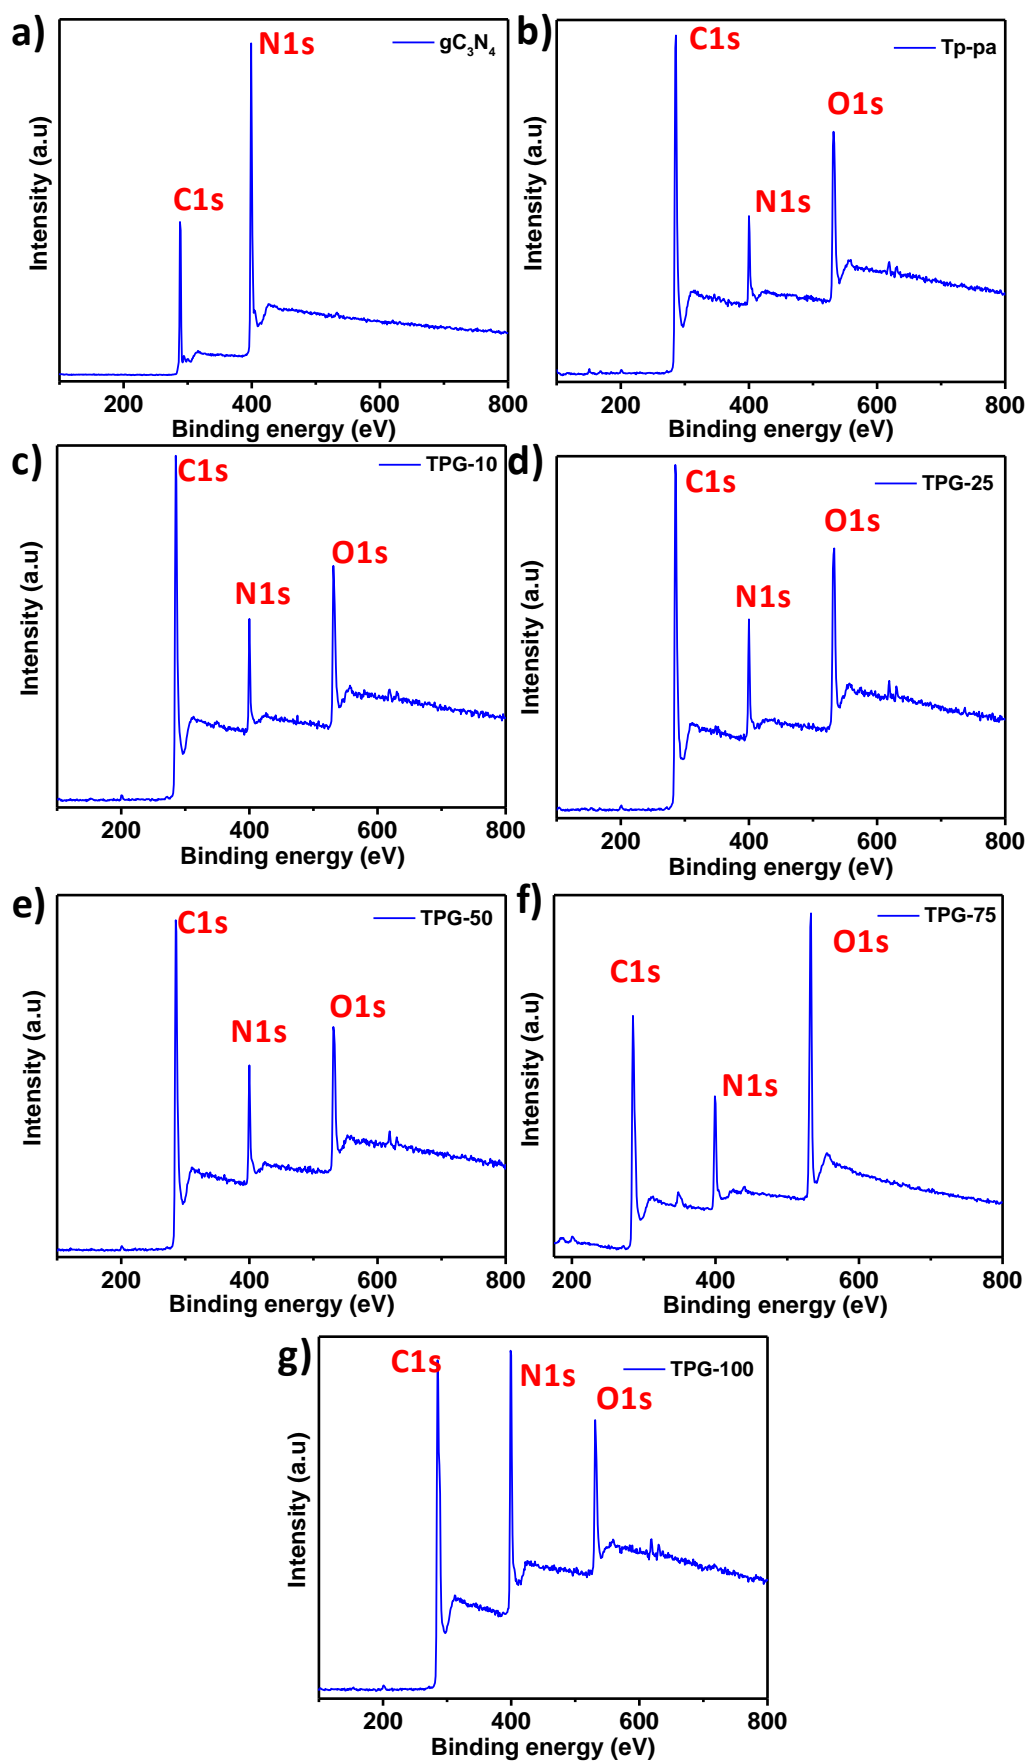

**Figure S5.** XPS survey scan spectra of a)  $gC_3N_4$ , b) Tp-Pa, c) TPG-10, d) TPG-25, e) TPG-50, f) TPG-75, g) TPG-100.

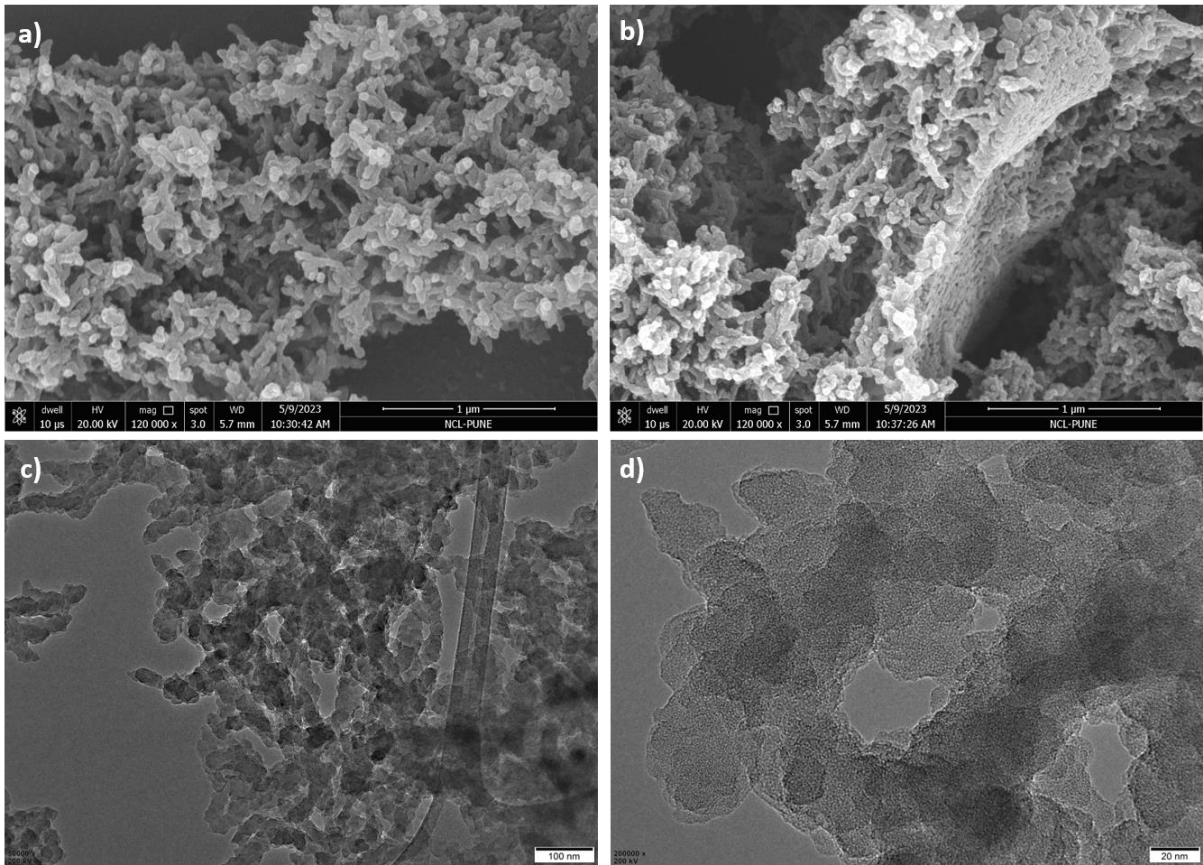

**Figure S6.** a, b) FE-SEM and c, d) HR-TEM images of **Tp-Pa**.

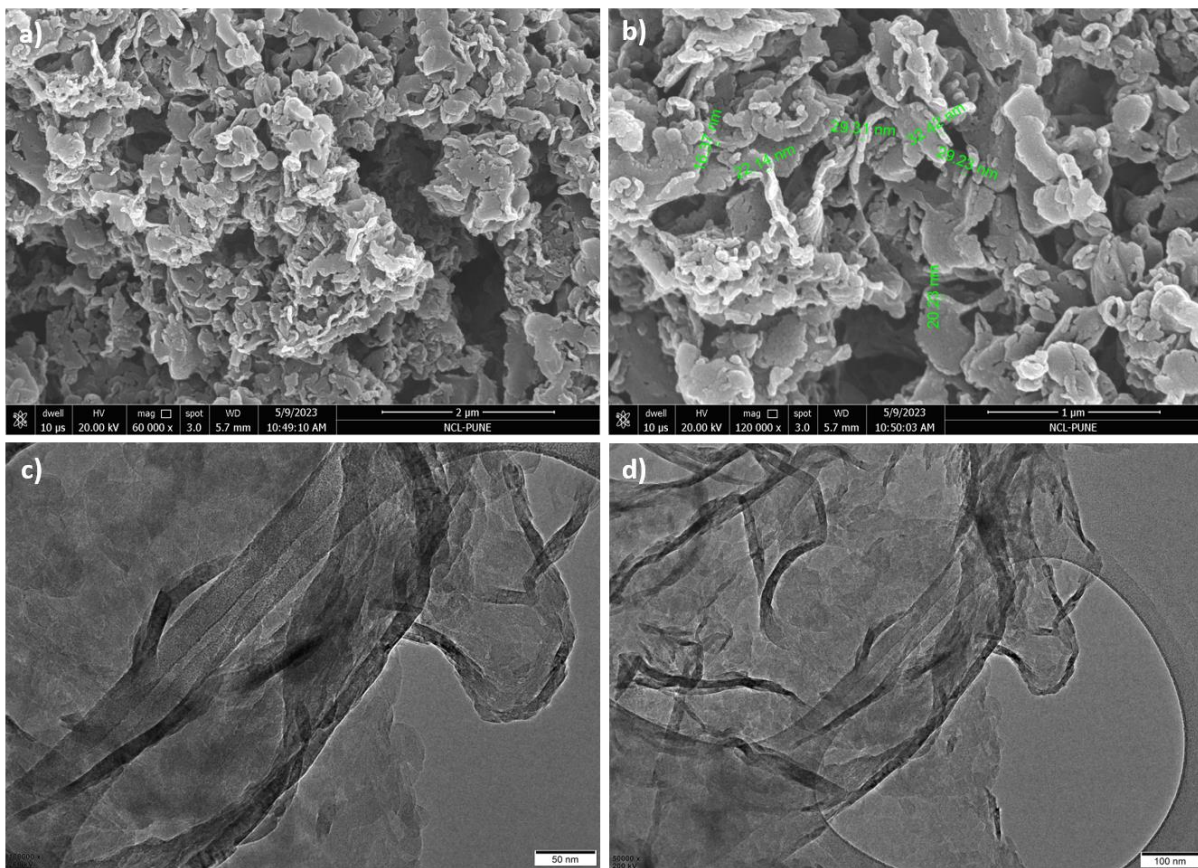

**Figure S7.** a, b) FE-SEM and c, d) HR-TEM images of gC<sub>3</sub>N<sub>4</sub>.



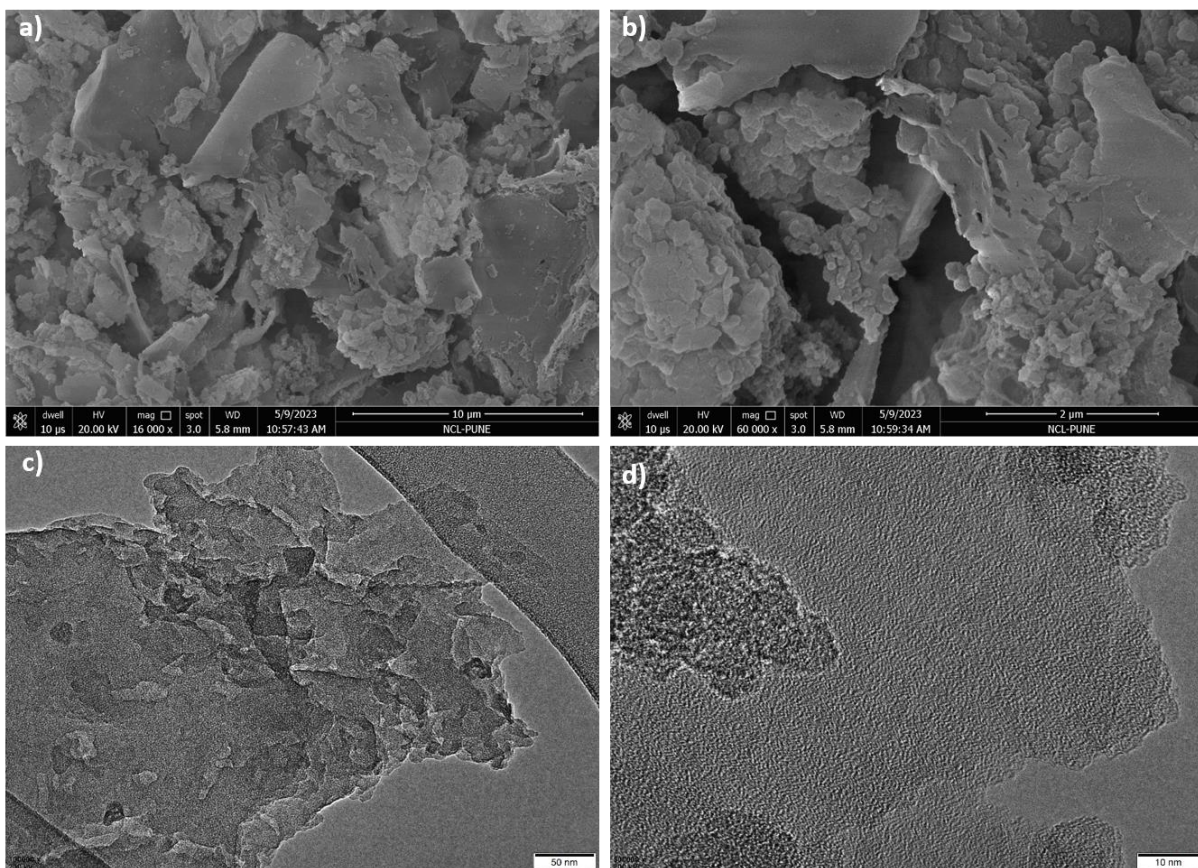

**Figure S8.** a, b) FE-SEM and c, d) HR-TEM images of TPG-10.



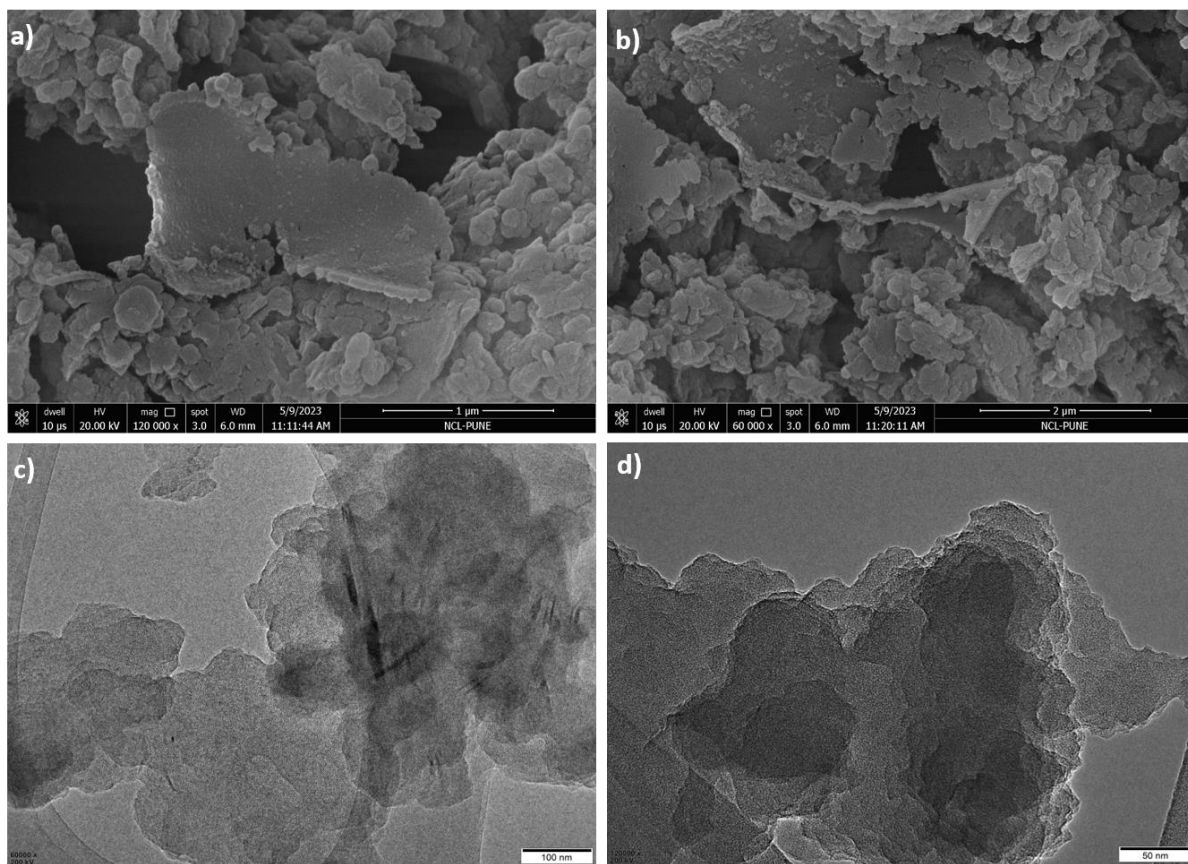

**Figure S9.** a, b) FE-SEM and c, d) HR-TEM images of TPG-25.

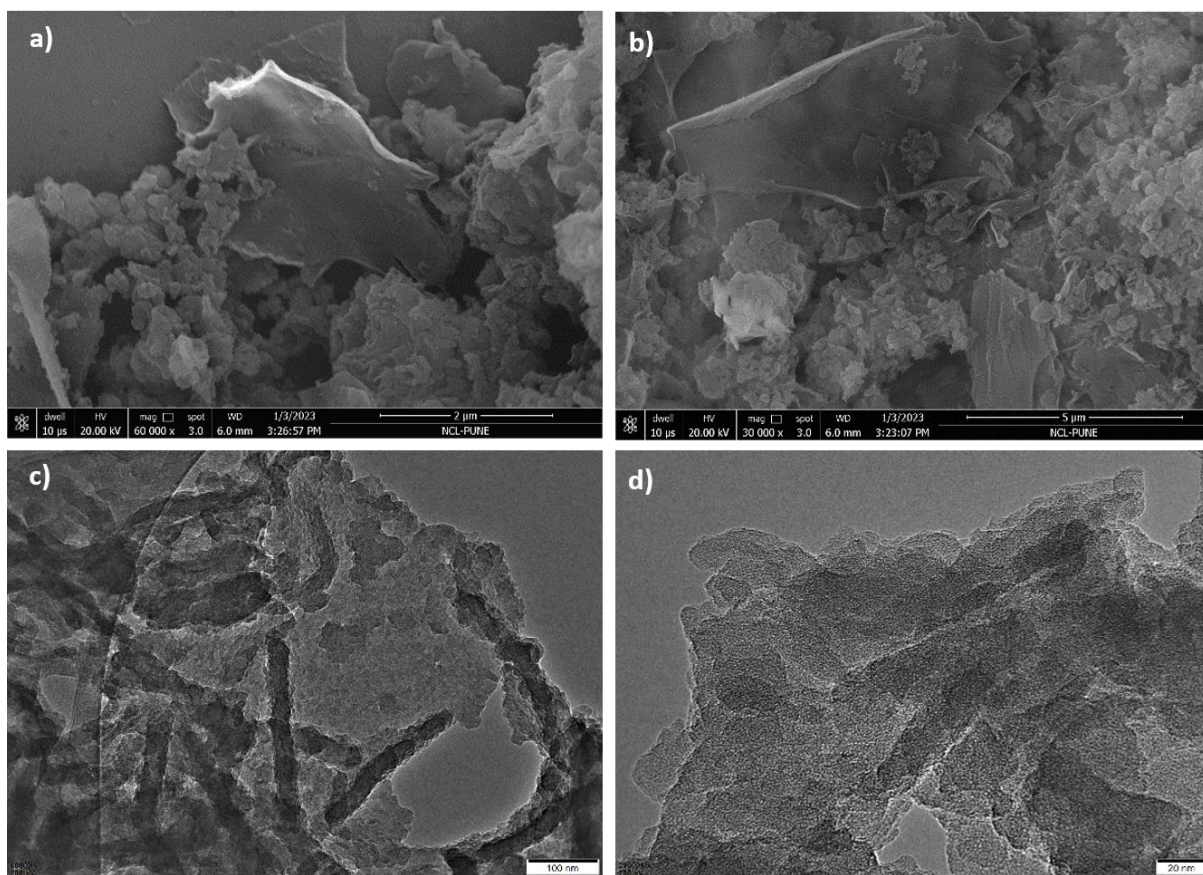

**Figure S10.** a, b) FE-SEM and c, d) HR-TEM images of TPG-50.

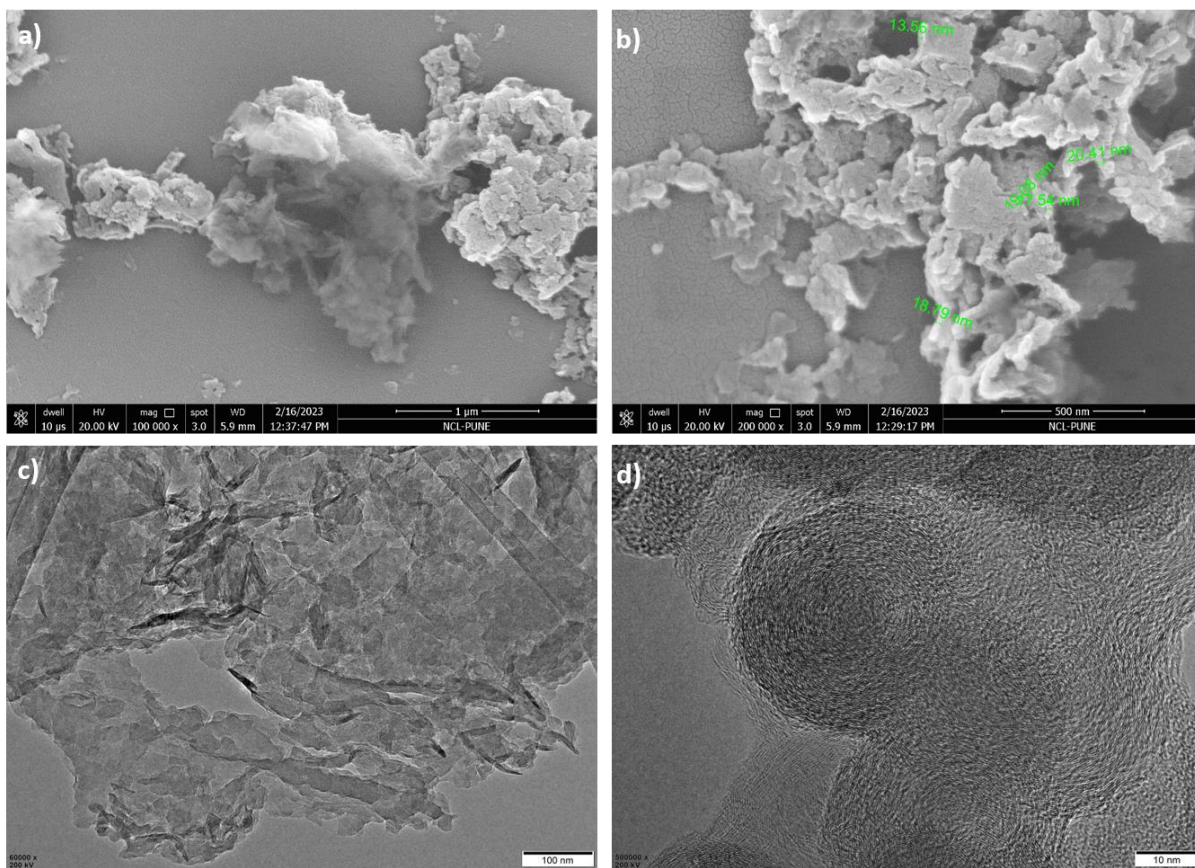

**Figure S11.** a, b) FE-SEM and c, d) HR-TEM images of TPG-75.



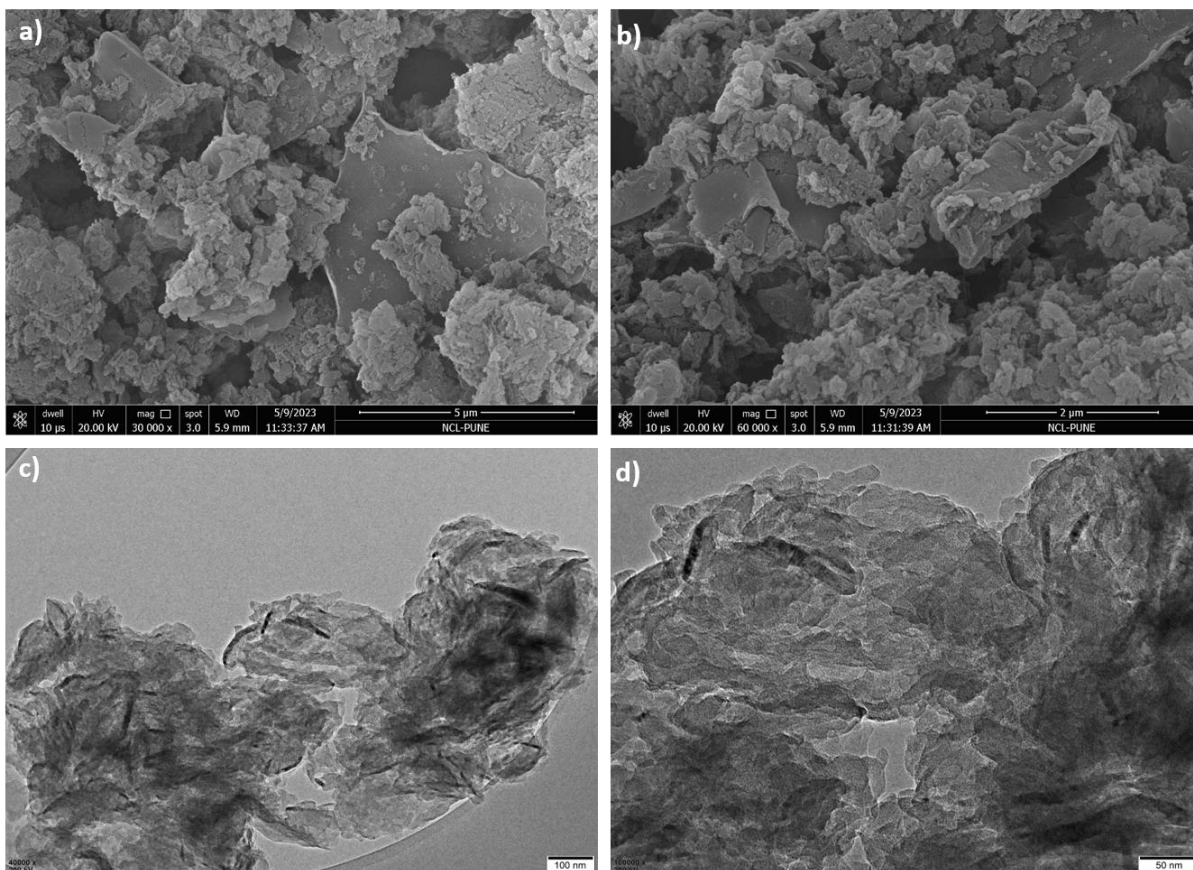

**Figure S12.** a, b) FE-SEM and c, d) HR-TEM images of **TPG-100**.

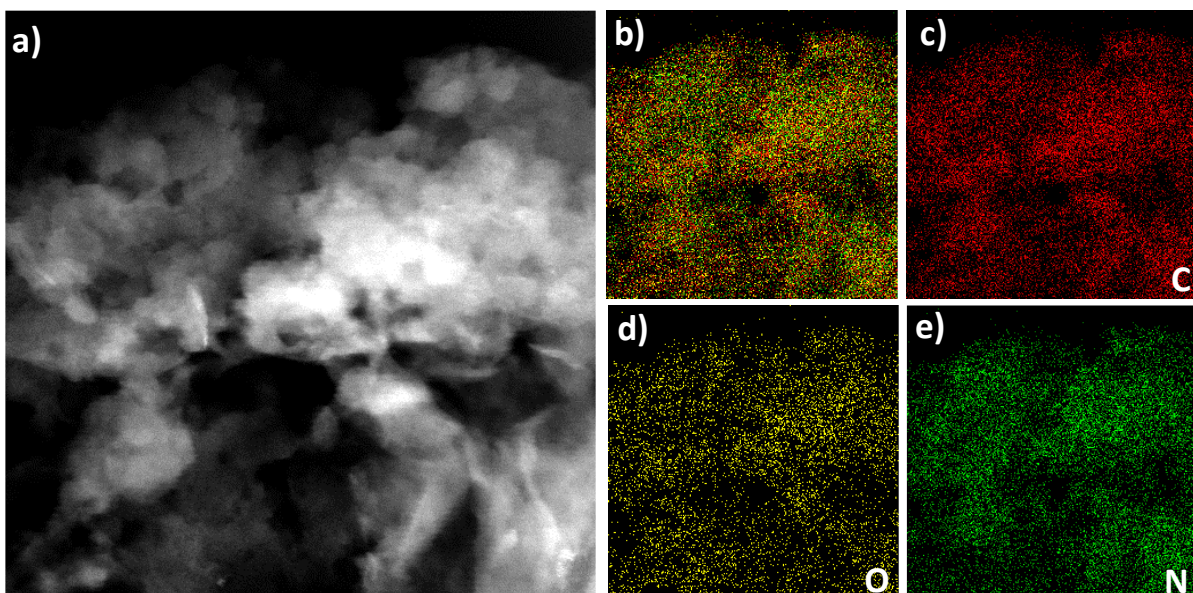

**Figure S13.** a) STEM image and elemental mapping of **TPG-75** showing b) overlay, c) C, d) O, and e) N, respectively.

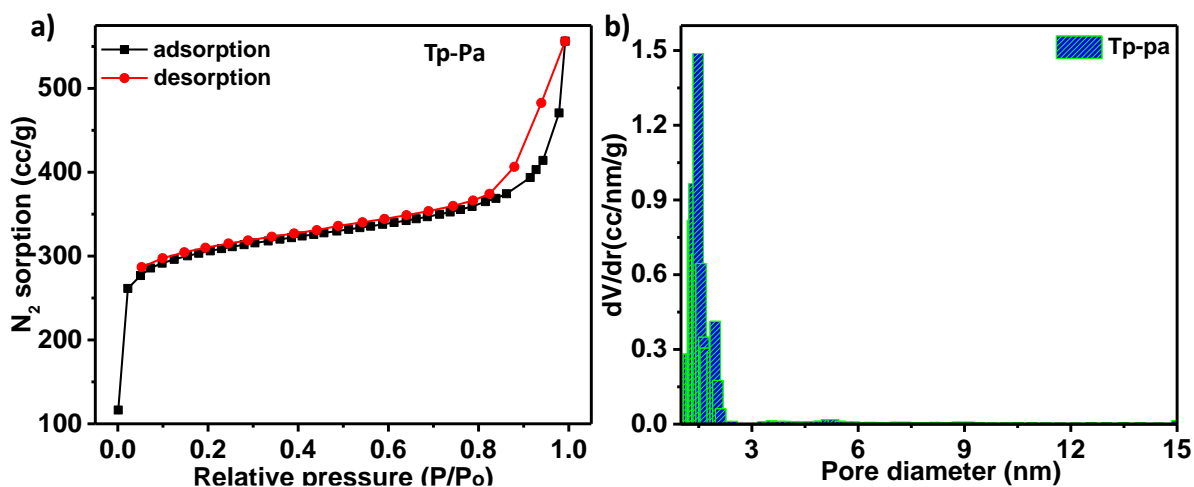

Figure S14. a) BET and b) pore size distribution of Tp-Pa.

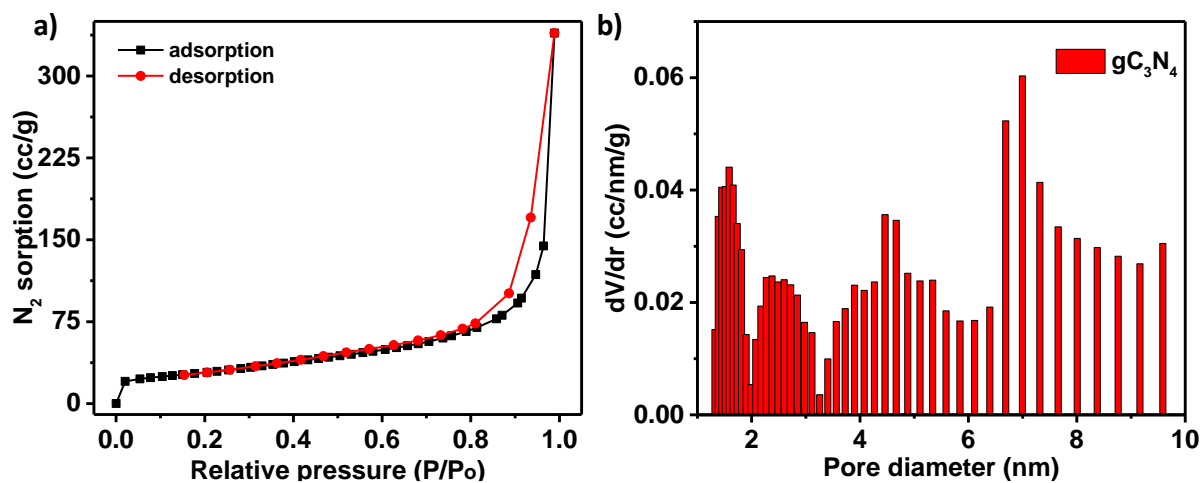

Figure S15. a) BET and b) pore size distribution of  $gC_3N_4$ .

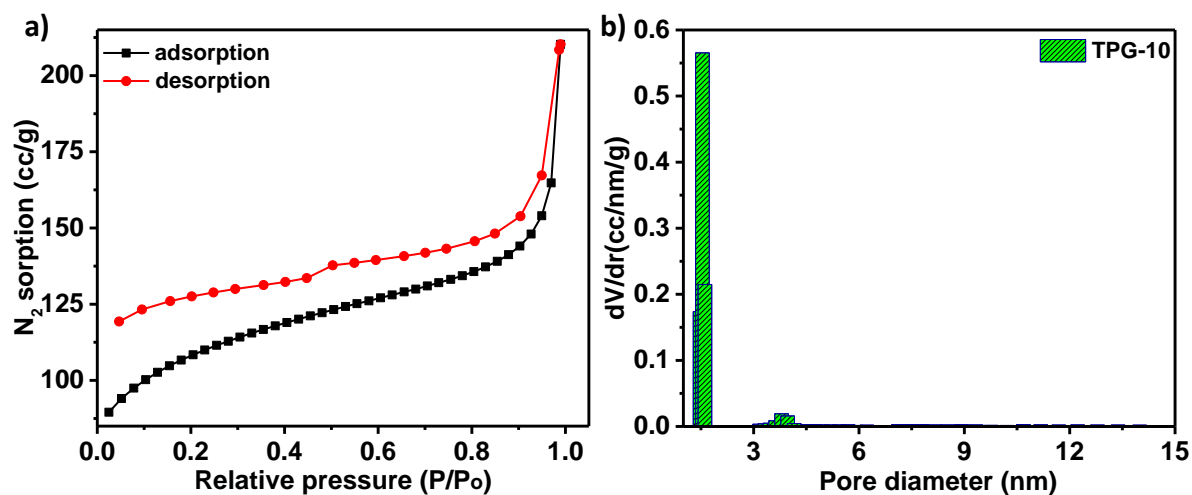

Figure S16. a) BET and b) pore size distribution of TPG-10.

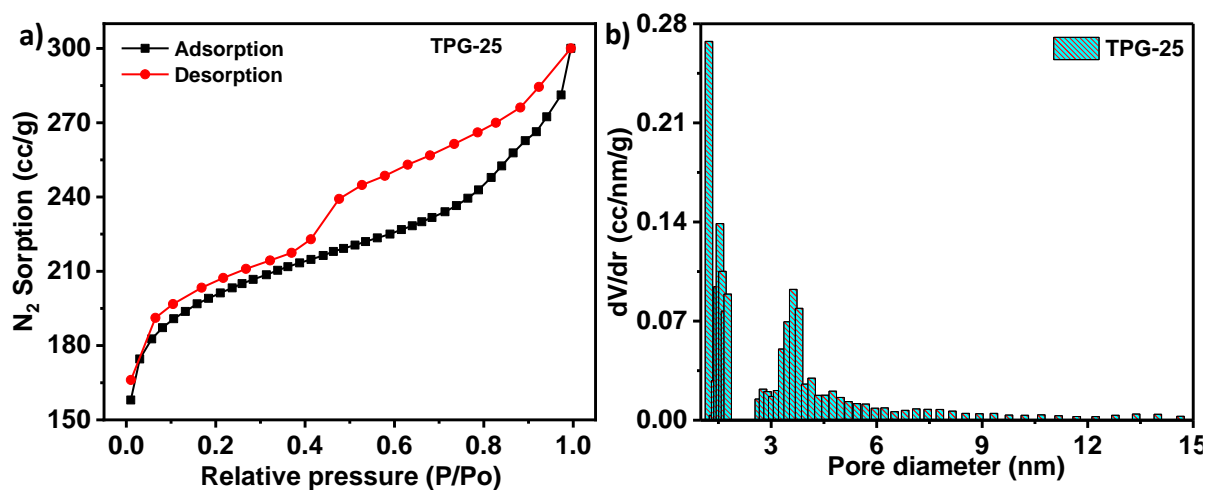

Figure S17. a) BET and b) pore size distribution of TPG-25.

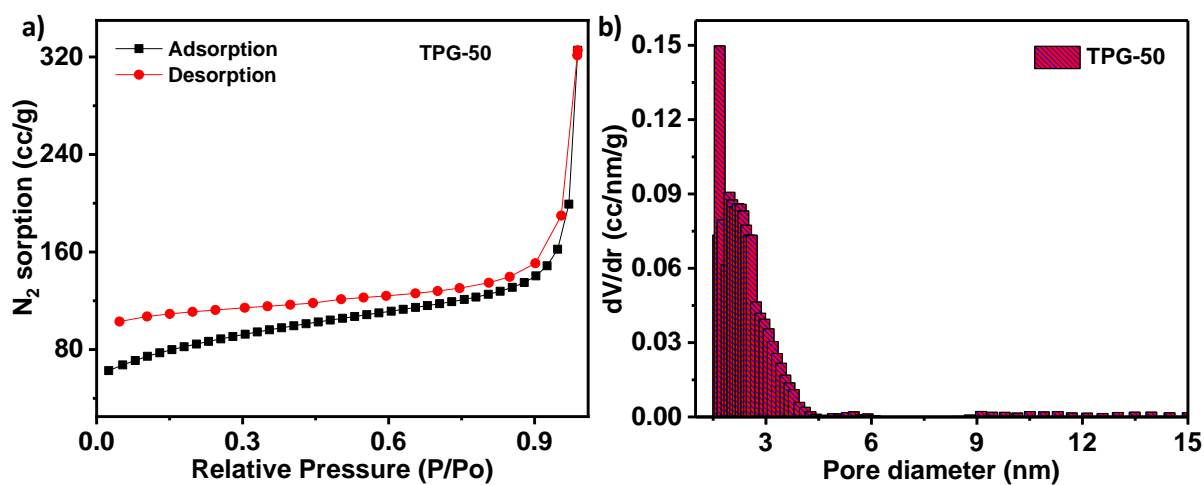

Figure S18. a) BET and b) pore size distribution of TPG-50.

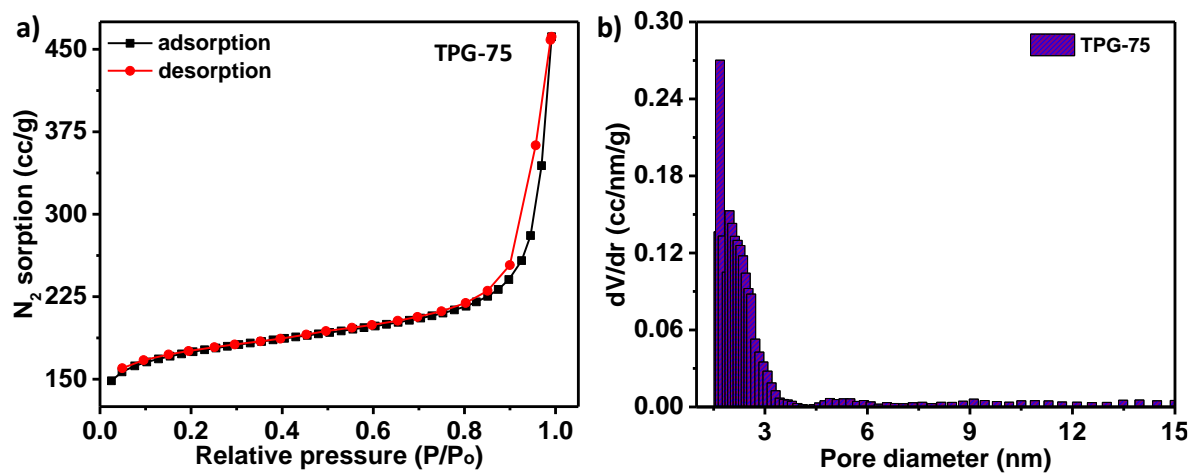

Figure S19. a) BET and b) pore size distribution of TPG-75.

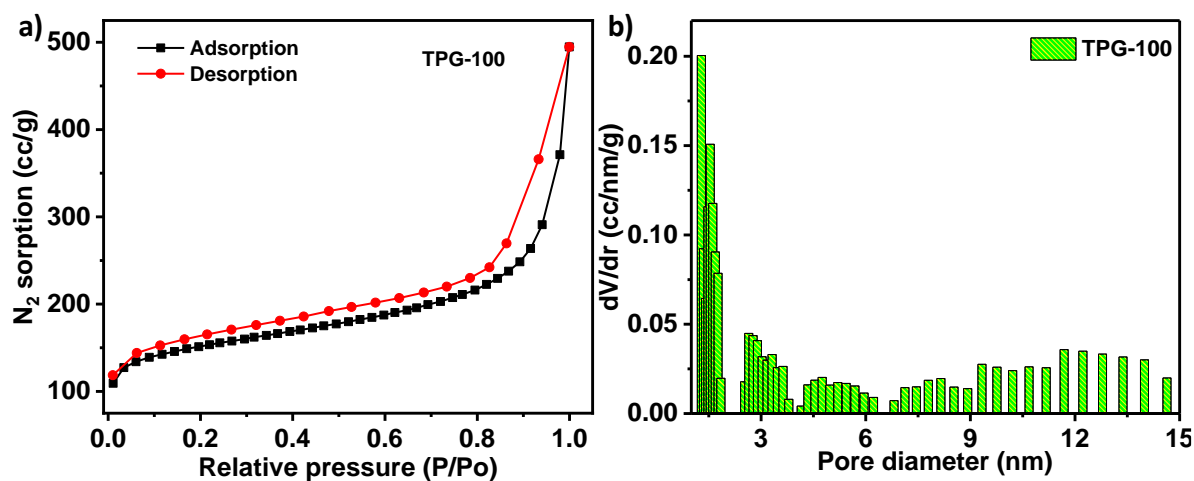

Figure S20. a) BET and b) pore size distribution of TPG-100.

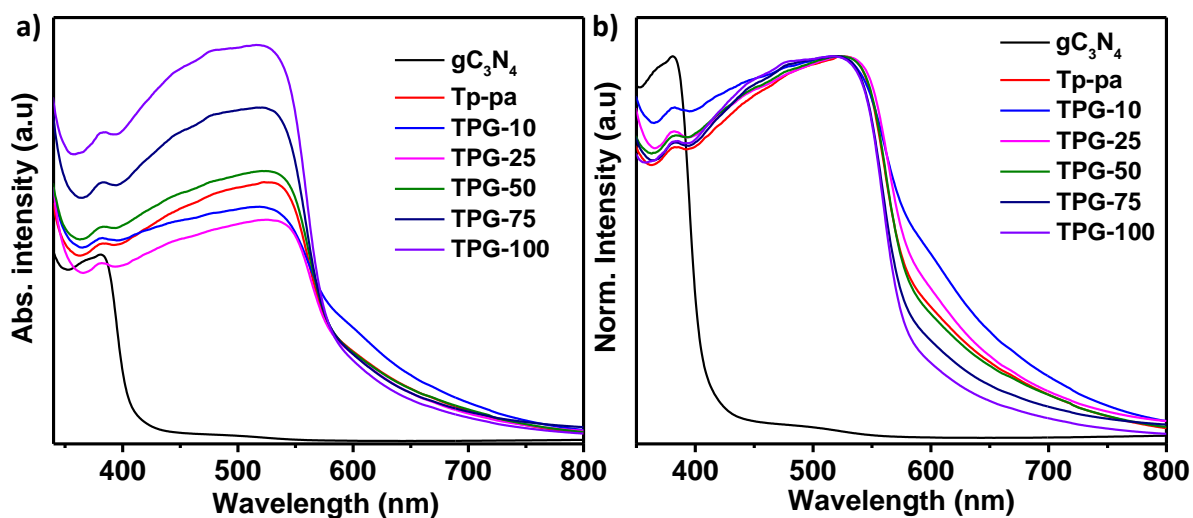

Figure S21. Solid-state UV-Vis DRS spectrum of  $gC_3N_4$ , **Tp-Pa**, and TPGs.

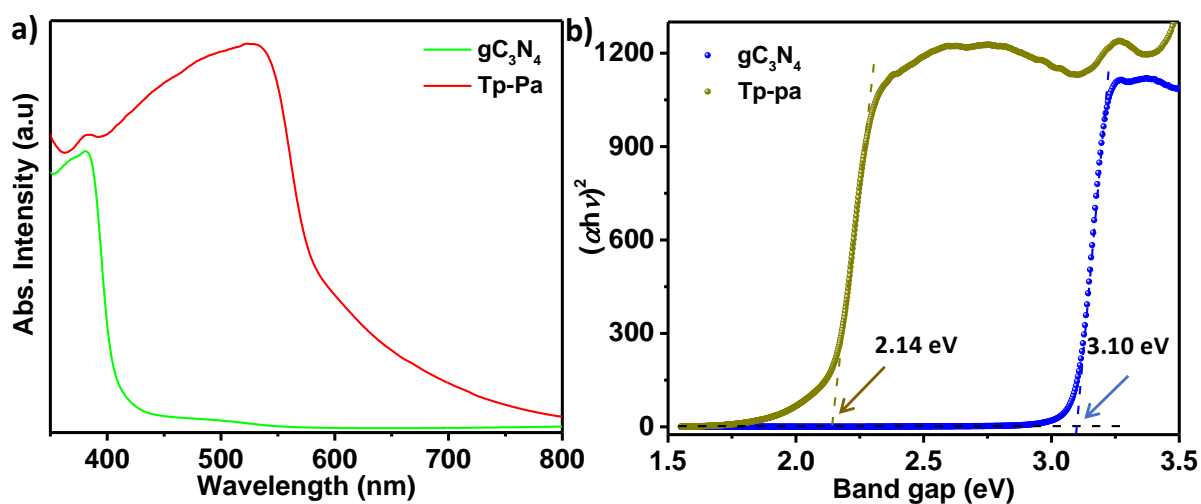

Figure S22. a) Solid-state UV-Vis DRS spectrum of  $gC_3N_4$  and **Tp-Pa**. b) corresponding tauc plot of  $gC_3N_4$  and **Tp-Pa**.



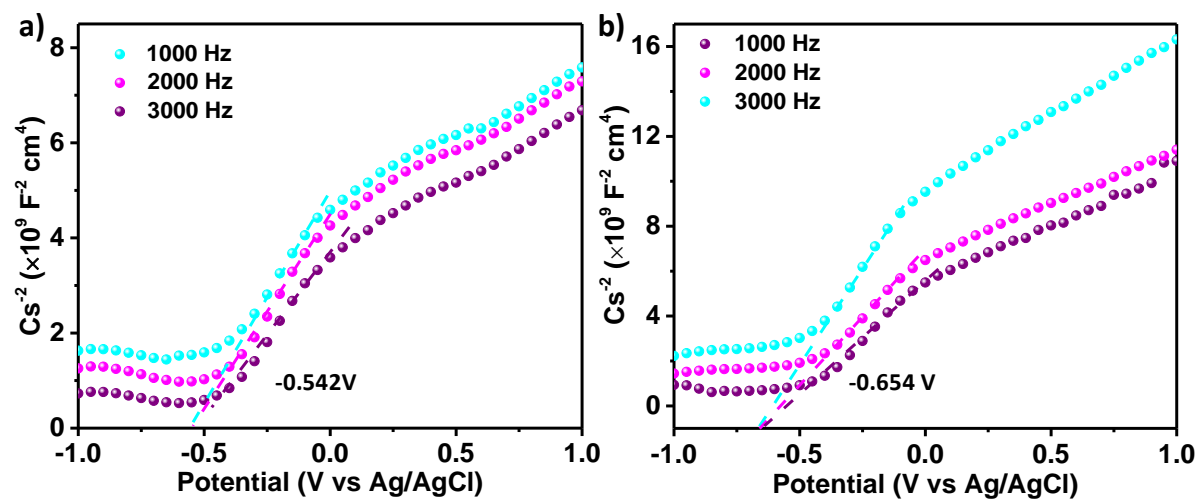

**Figure S23.** Mott-Schottky measurements with varying frequencies for a) **Tp-Pa**, b) **gC<sub>3</sub>N<sub>4</sub>**.

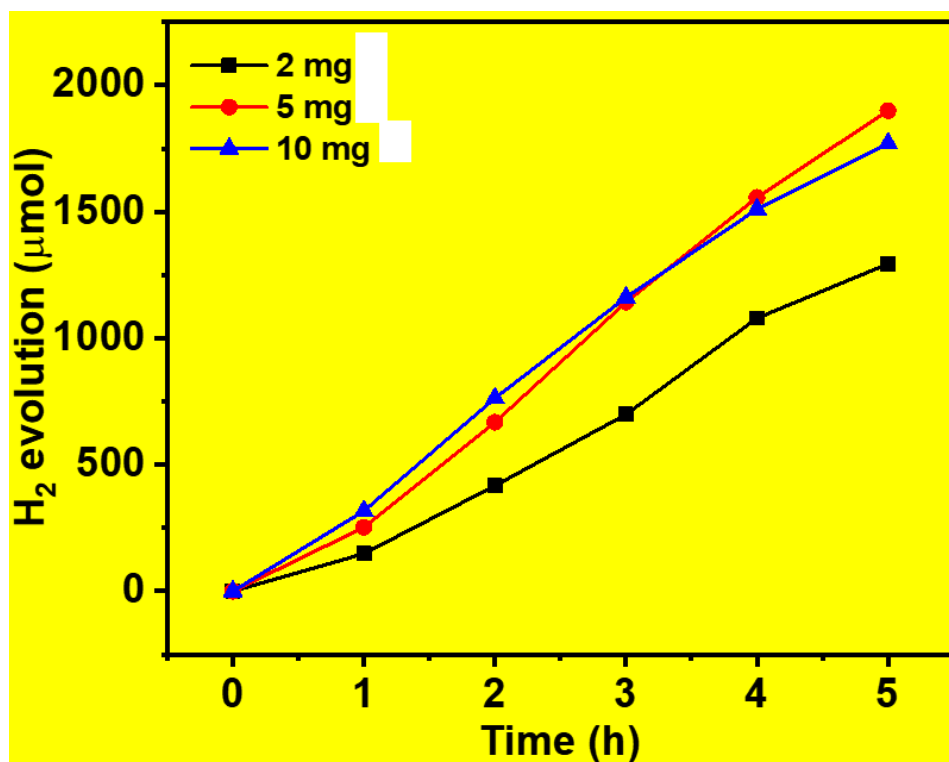

Figure S24. Comparison of the HER of TPG-75 with varying catalyst amount.

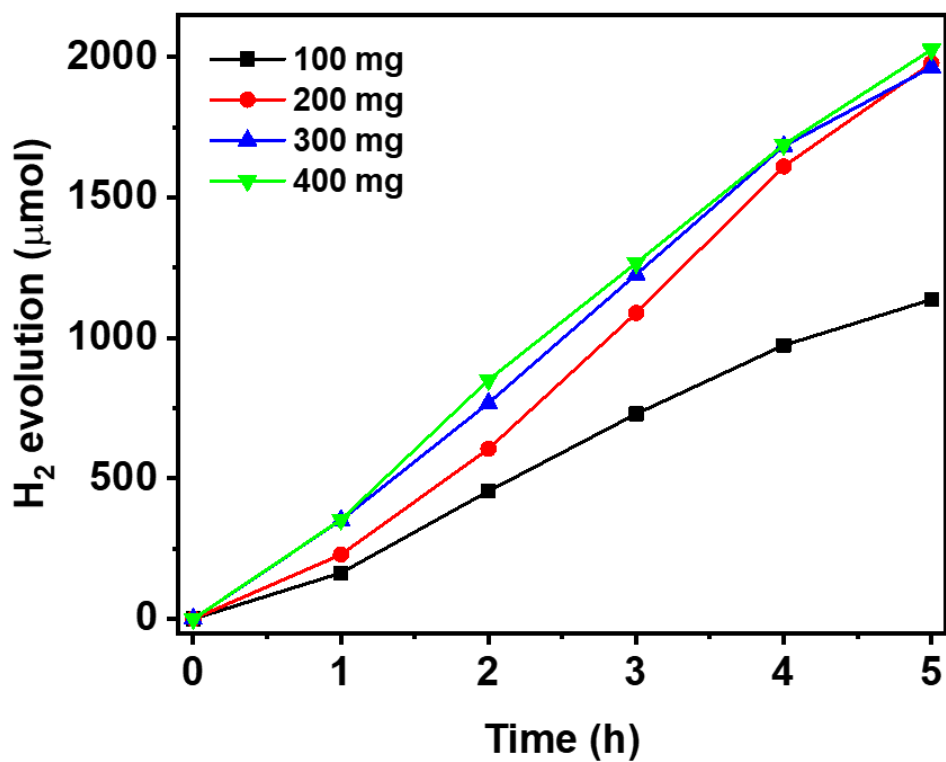

Figure S25. Comparison of the HER of TPG-75 with varying SED amounts.

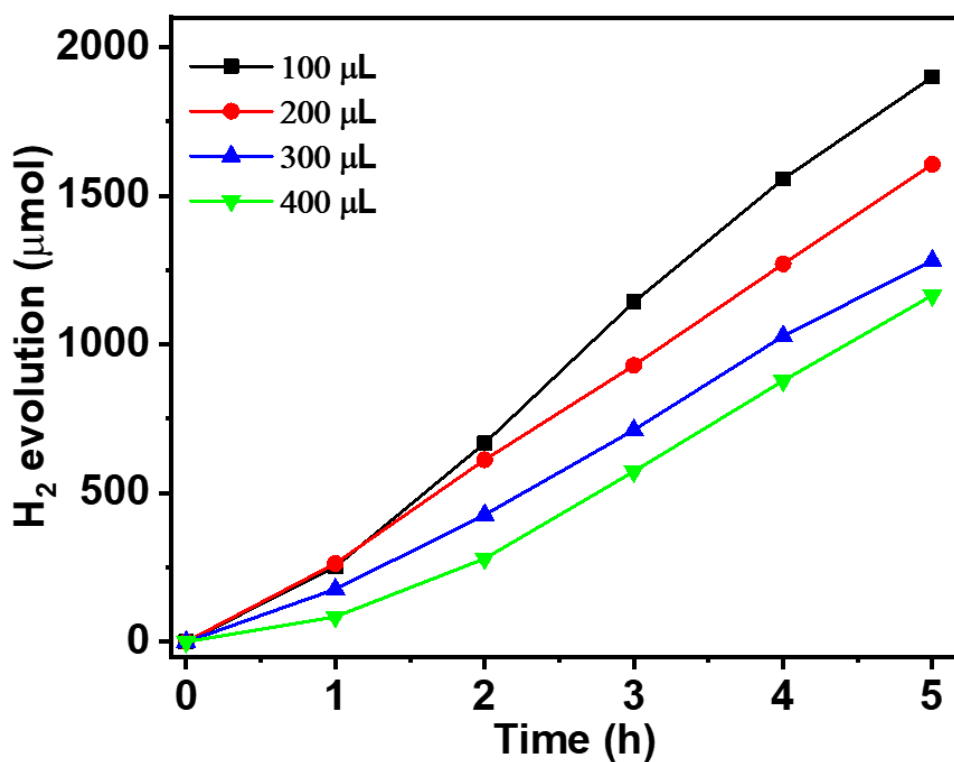

Figure S26. Comparison of the HER of TPG-75 with varying amounts of co-catalyst.

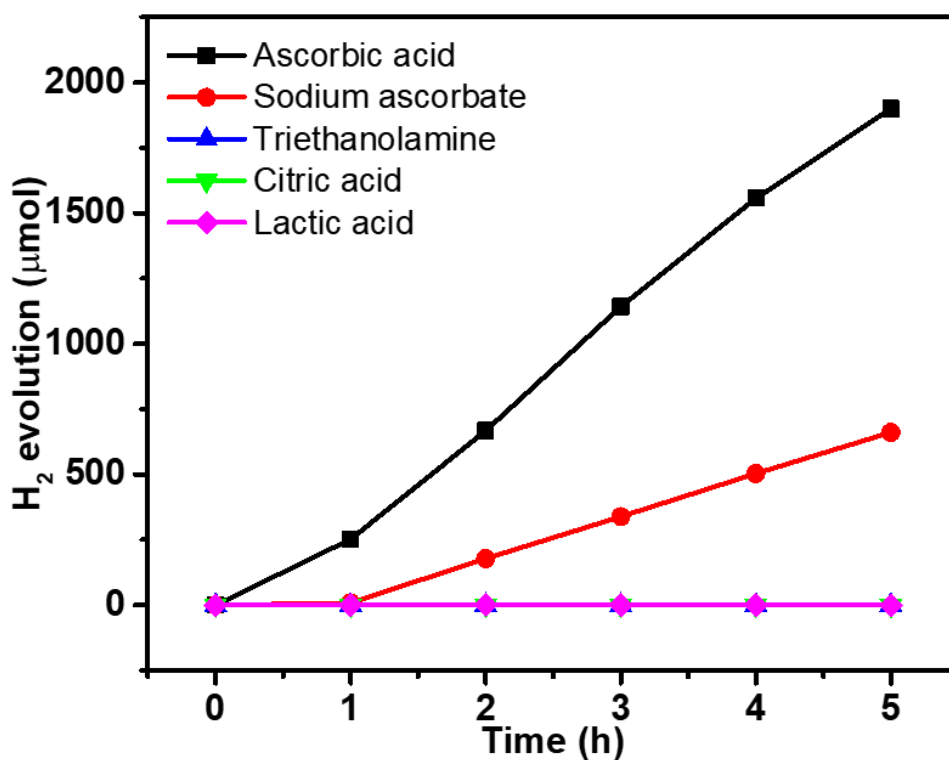

Figure S27. Comparison of the HER of TPG-75 with varying SED.

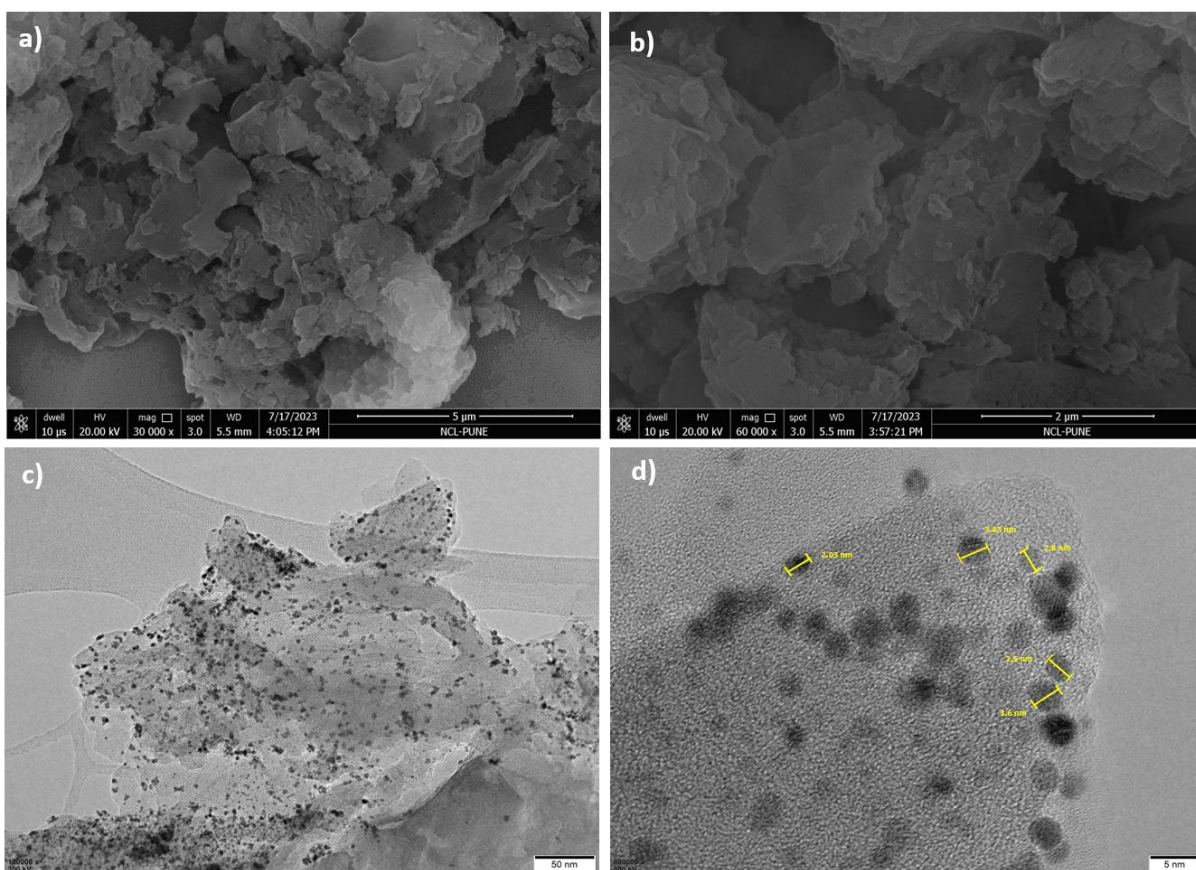

**Figure S28.** HR-TEM images of **TPG-75** after cyclic studies.

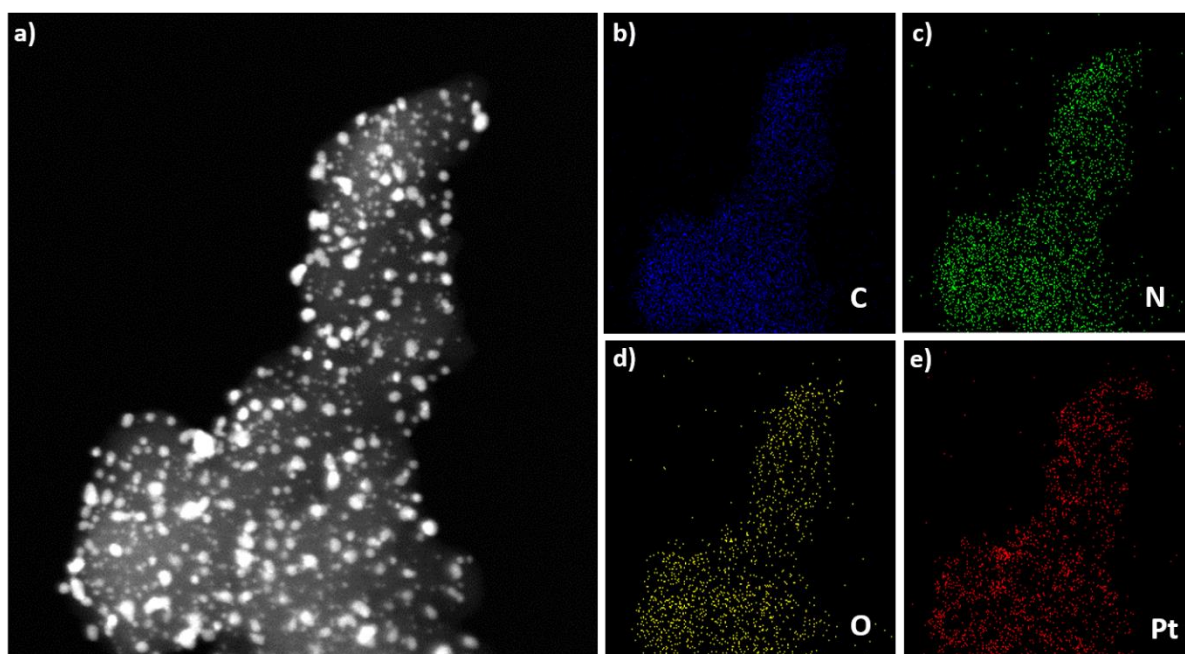

**Figure S29.** a) STEM image of **TPG-75** and elemental mapping of **TPG-75** showing b) C, c) N, d) O, and e) Pt NPs, respectively.

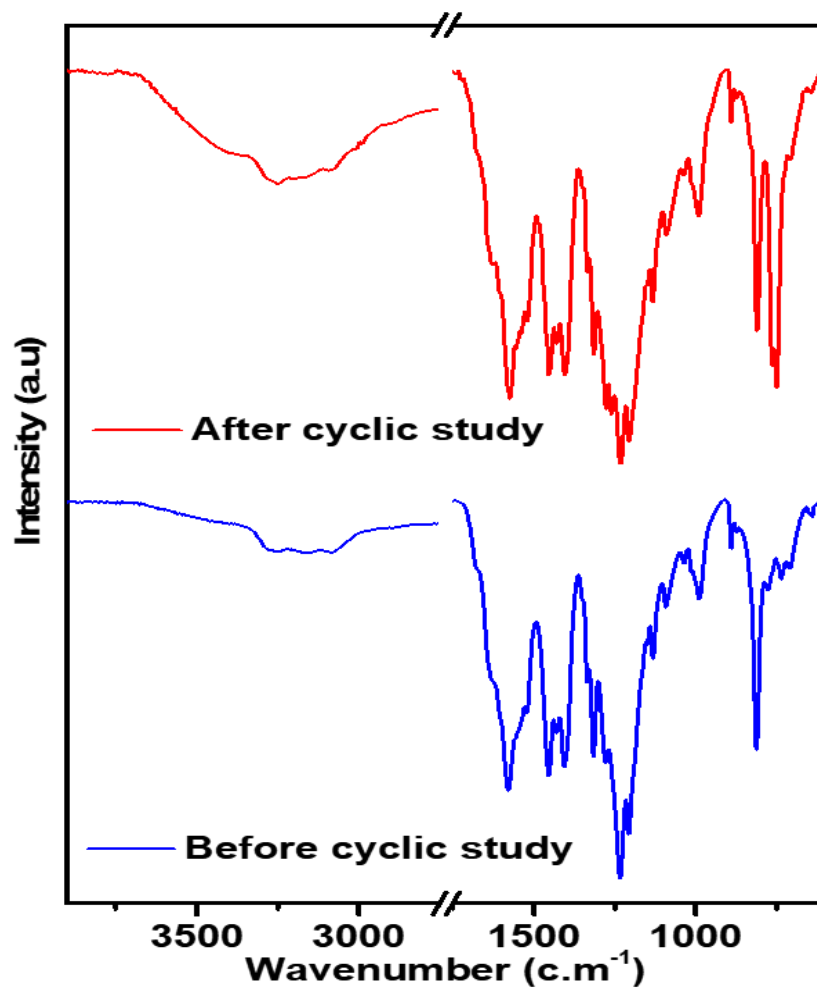

**Figure S30.** FT-IR spectra of TPG-75 before and after cyclic studies.

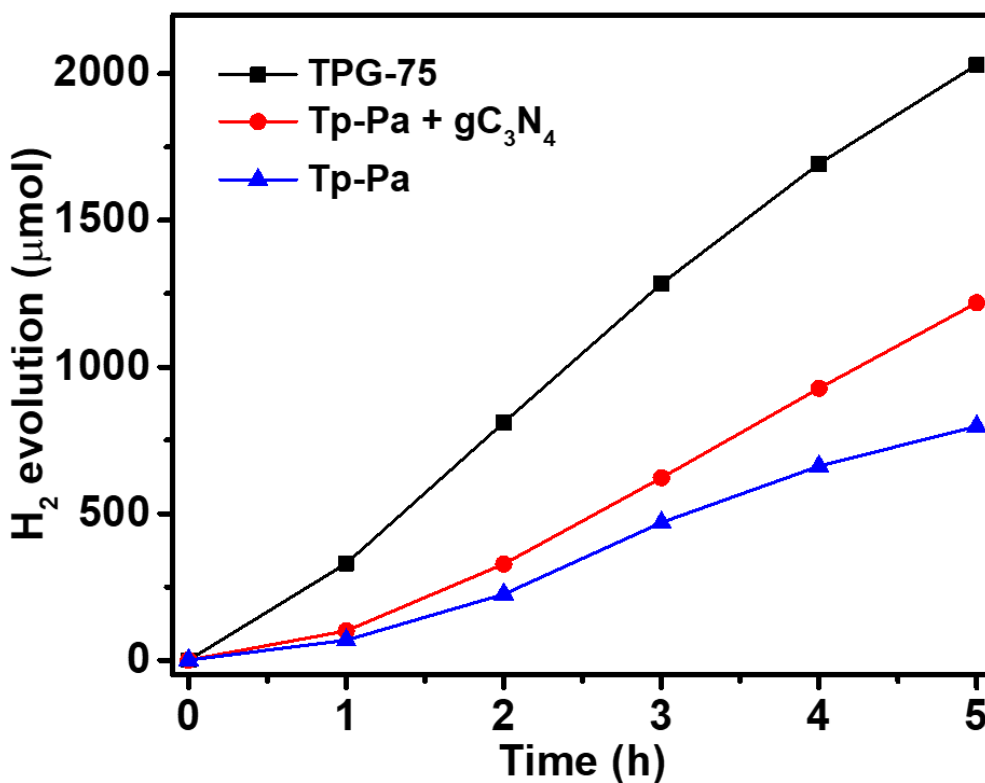

**Figure S31.** Effect of physical mixing of **Tp-Pa** and **gC<sub>3</sub>N<sub>4</sub>** on HER. Comparison of the HER of **Tp-Pa**, physical mixing of **Tp-Pa** with **gC<sub>3</sub>N<sub>4</sub>** and **TPG-75**.

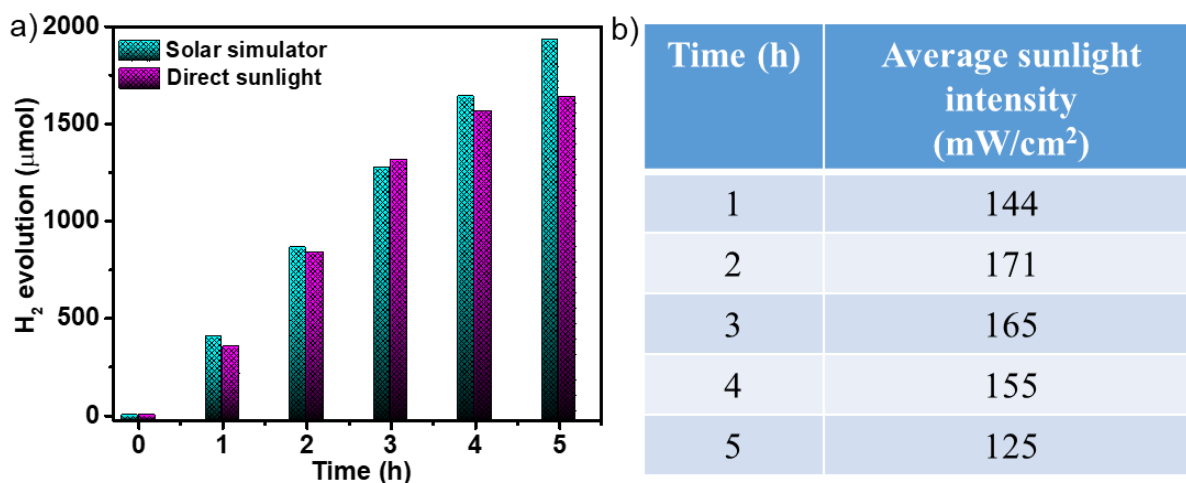

**Figure S32.** a) Comparison of the HER performance of **TPG-75** under solar simulator and direct sunlight irradiation and b) the average sunlight intensity during 5 h HER experiment.

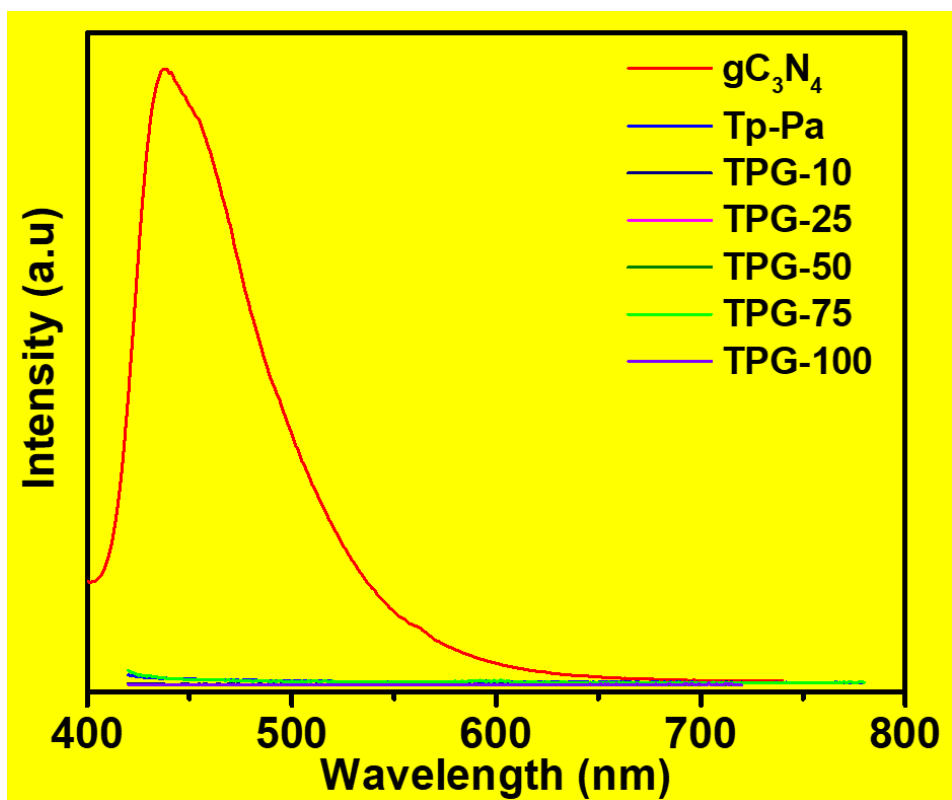

**Figure S33.** Photoluminescence spectra of  $\text{gC}_3\text{N}_4$ , **Tp-Pa** and **TPG-x** derivatives  $\lambda_{\text{ex}}$  for  $\text{gC}_3\text{N}_4$  is 370 nm and for **Tp-Pa**, **TPG-75** is 420 nm.

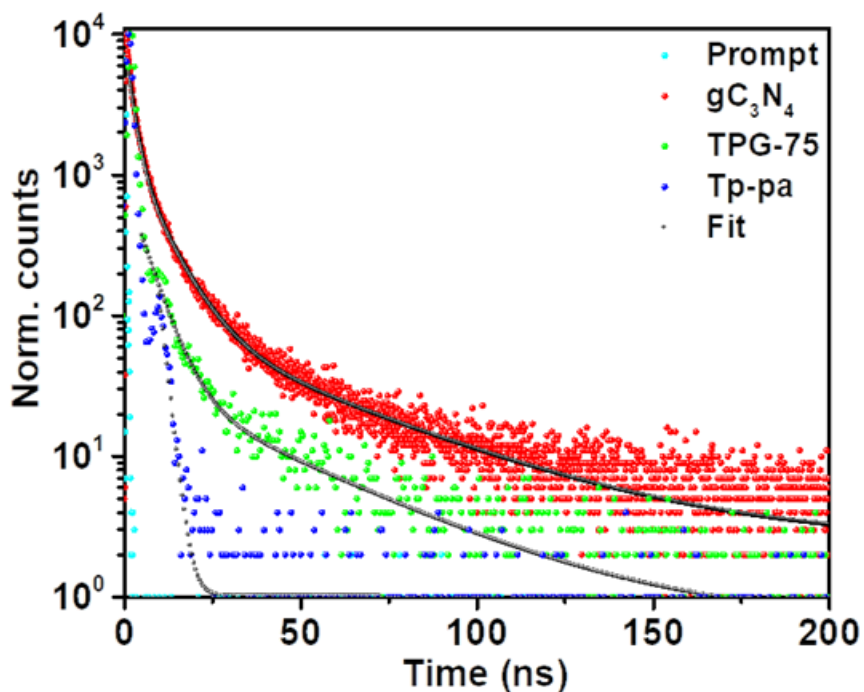

**Figure S34.** Photoluminescence lifetime spectra of emission of  $\text{gC}_3\text{N}_4$ , **TPG-75**, and **Tp-Pa** monitored at 445 nm,  $\lambda_{\text{ex}} = 345$  nm.

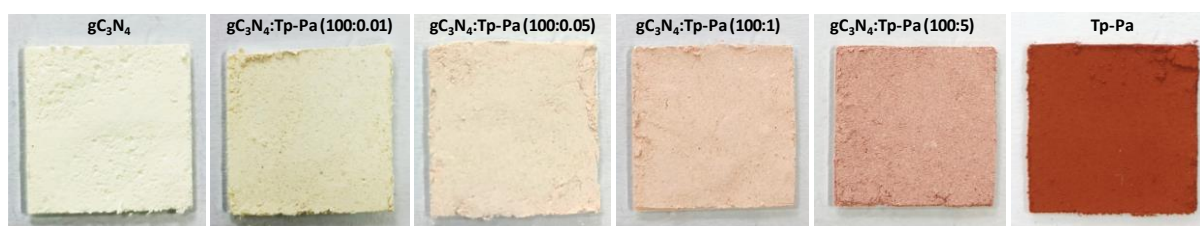

**Figure S35.** Photographs of pristine  $gC_3N_4$  and  $gC_3N_4$  mixed with  $Tp-Pa$  in different ratios.

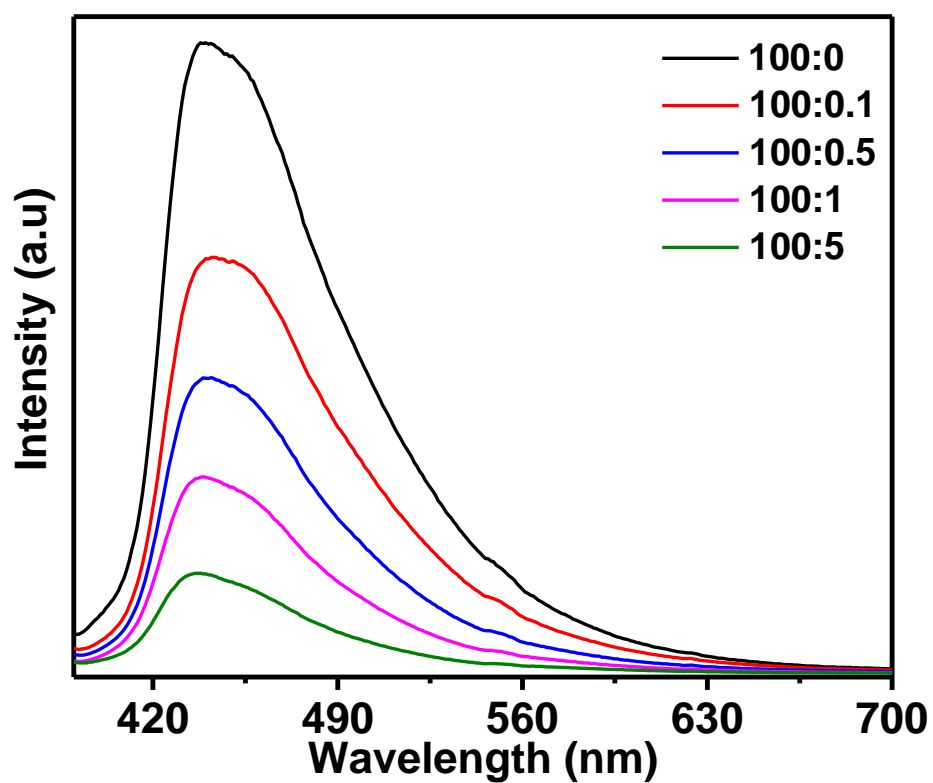

**Figure S36.** Photoluminescence emission of pristine  $gC_3N_4$  and  $gC_3N_4$  mixed with  $Tp-Pa$  in different ratios in the solid state ( $gC_3N_4:Tp-Pa$ ),  $\lambda_{ex} = 370$  nm.



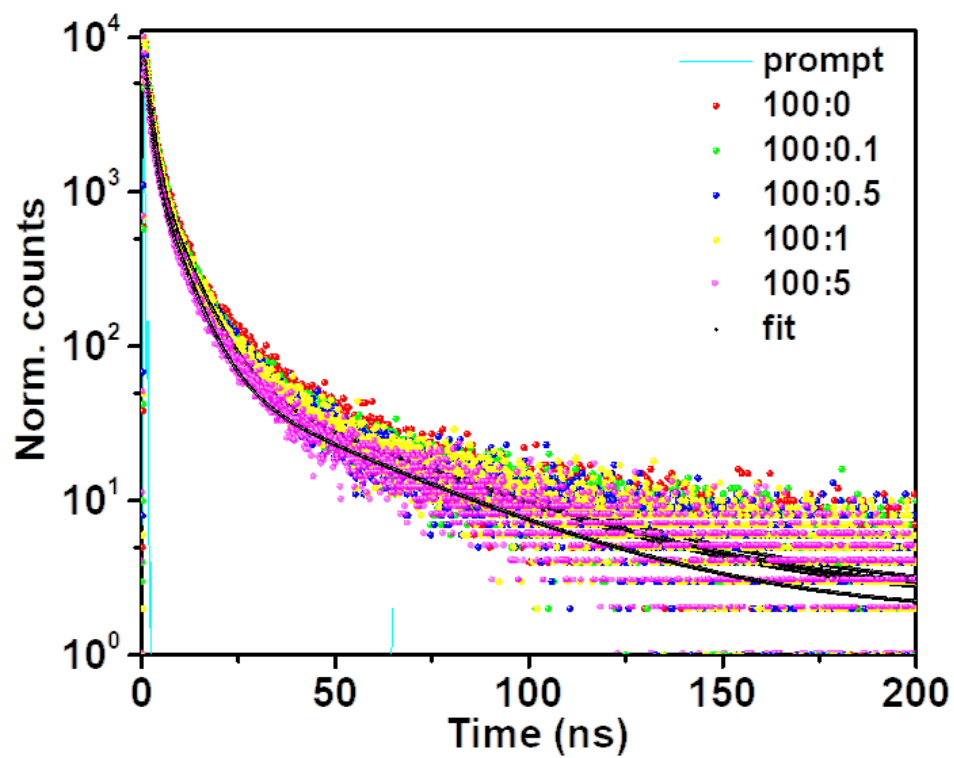

**Figure S37.** Photoluminescence lifetime spectra of pristine **gC<sub>3</sub>N<sub>4</sub>** and **gC<sub>3</sub>N<sub>4</sub>** mixed with **Tp-Pa** in different ratios (**gC<sub>3</sub>N<sub>4</sub>**:**Tp-Pa**).  $\lambda_{\text{ex}} = 345 \text{ nm}$ ,  $\lambda_{\text{mon}} = 445 \text{ nm}$ .

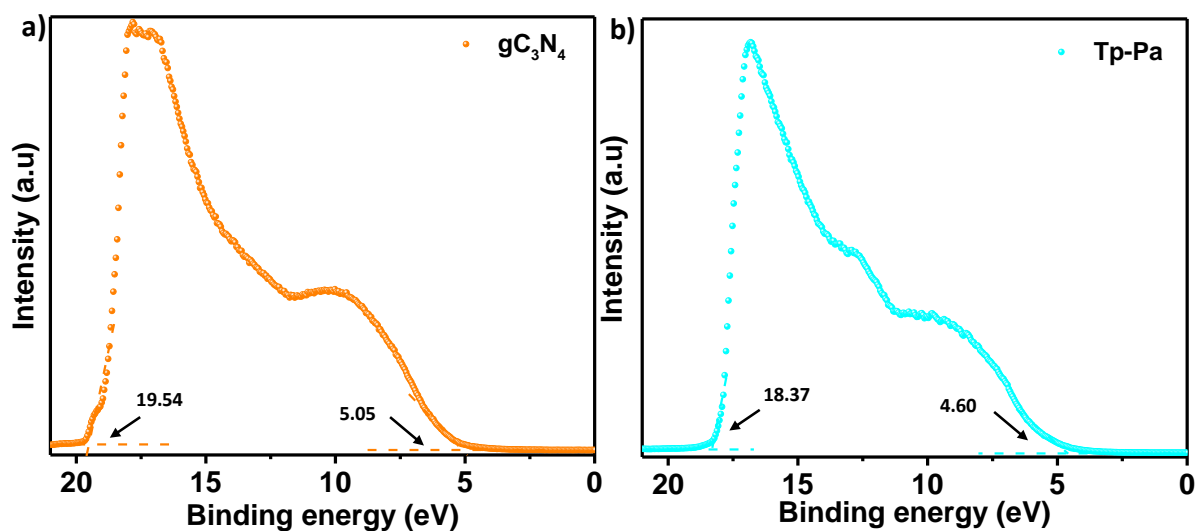

Figure 38. UPS spectrum of a)  $gC_3N_4$ , b) Tp-Pa.

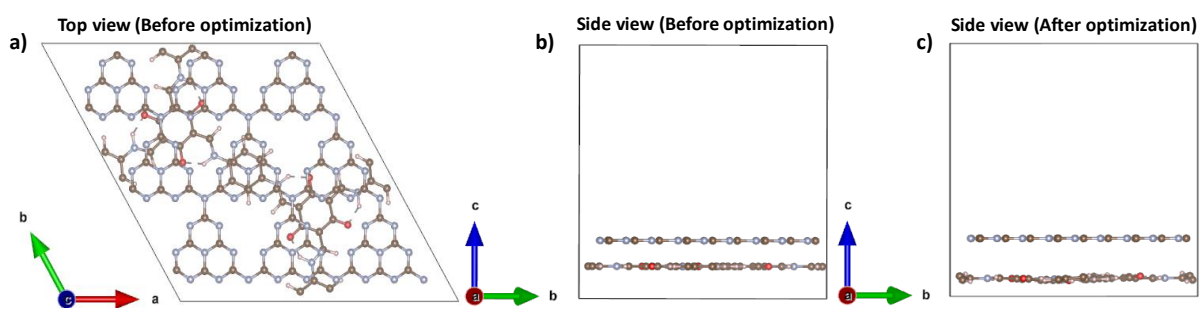

Figure S39. Tp-Pa/ $gC_3N_4$  heterostructure before optimization a) top view, b) side view. c) side view of Tp-Pa/ $gC_3N_4$  heterostructure after optimization.

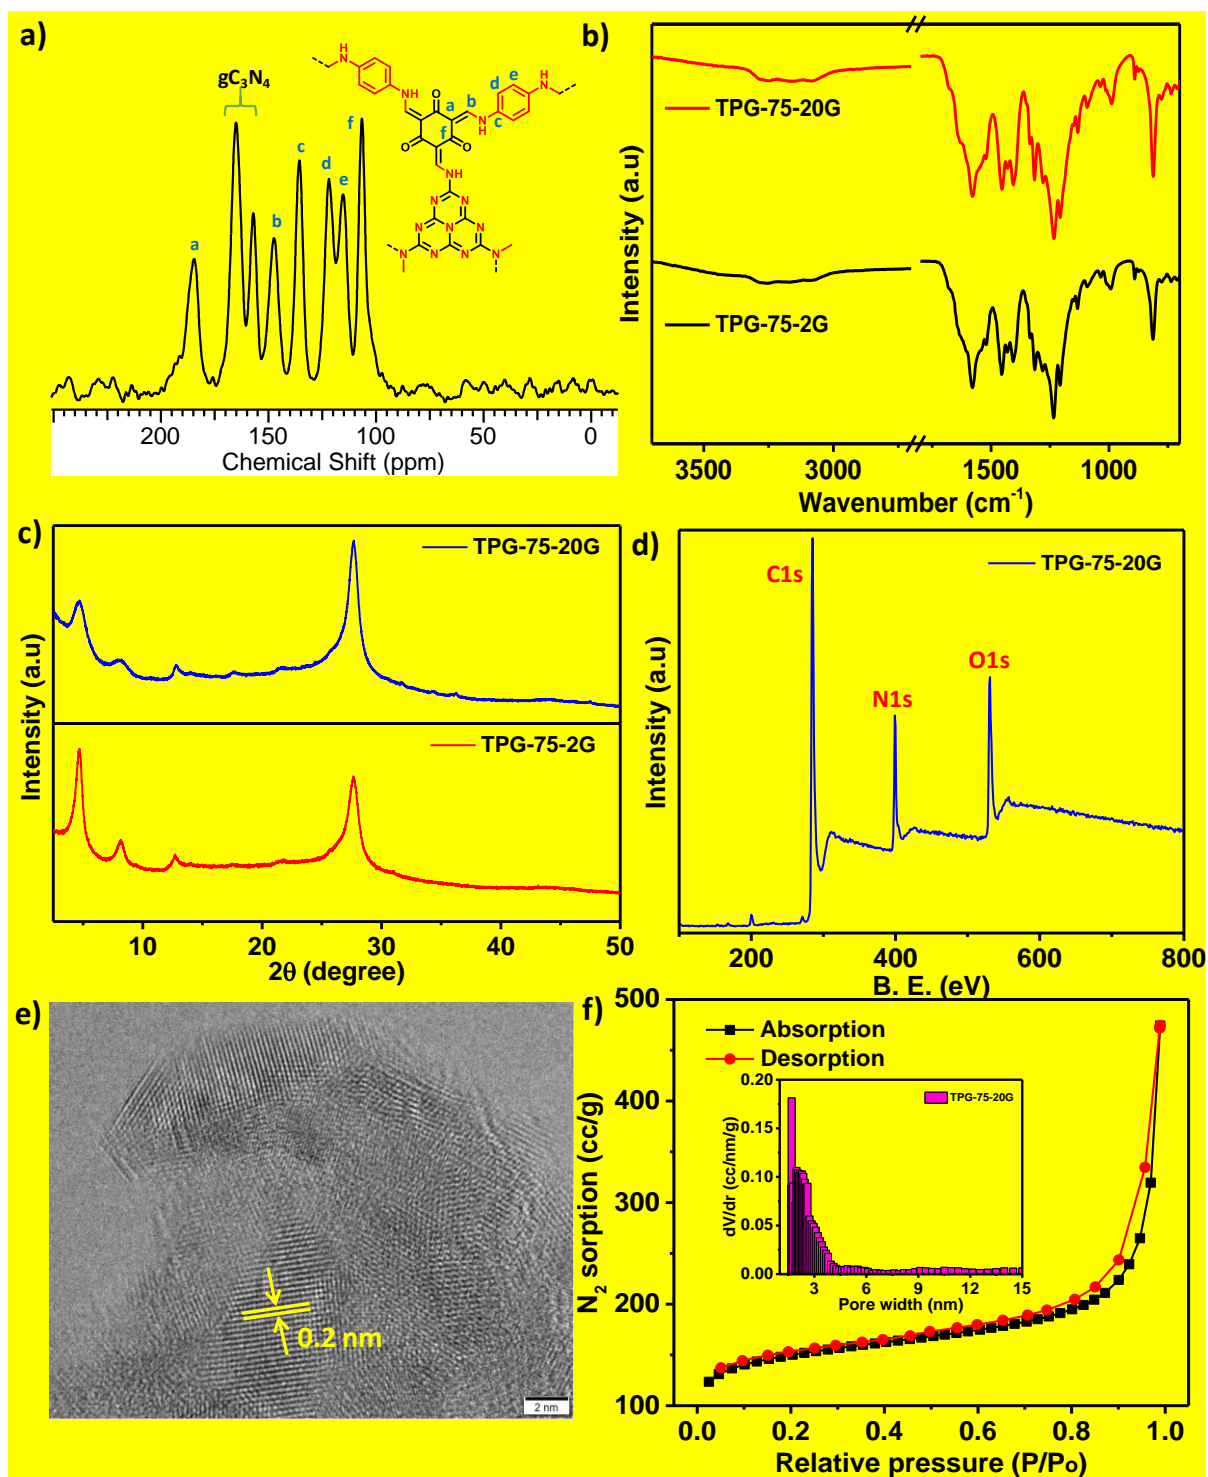

**Figure S40.** a)  $^{13}\text{C}$  CP MAS NMR, b) FT-IR, c) PXRD, d) XPS, e) HR-TEM images showing fringes and d-spacing, and f) BET surface area (Pore size distribution as inset) of **TPG-75-20G** synthesized using planetary mixer.

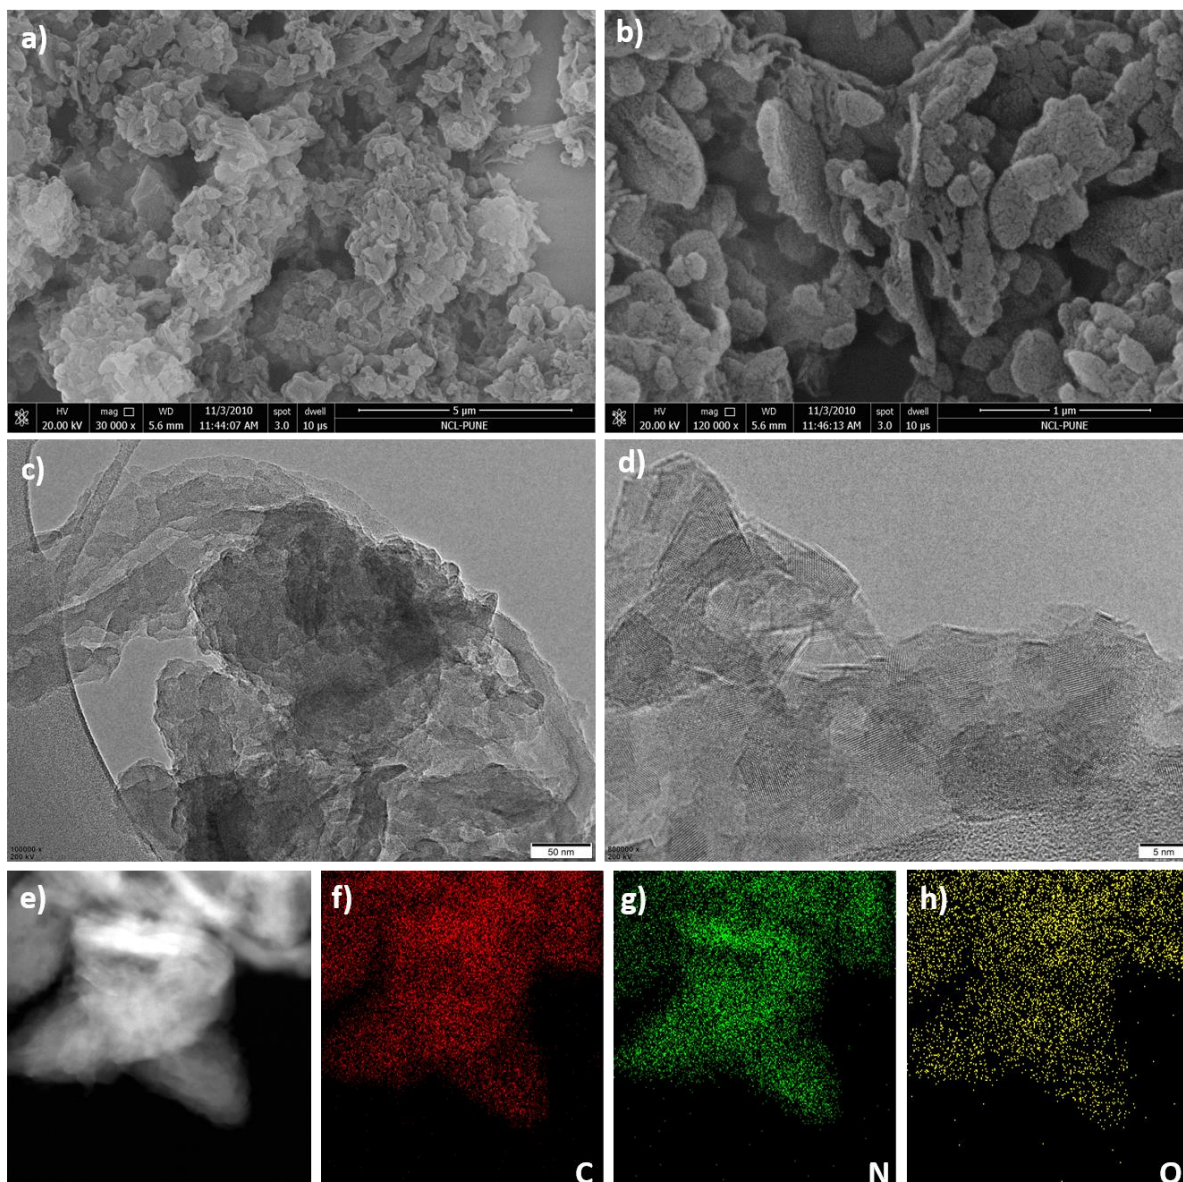

**Figure S41.** Electron microscopy characterisations of **TPG-75-20G** a,b) FE-SEM images. c,d) HR-TEM images. e-h) STEM elemental mapping showing overlay, C, N, O respectively.

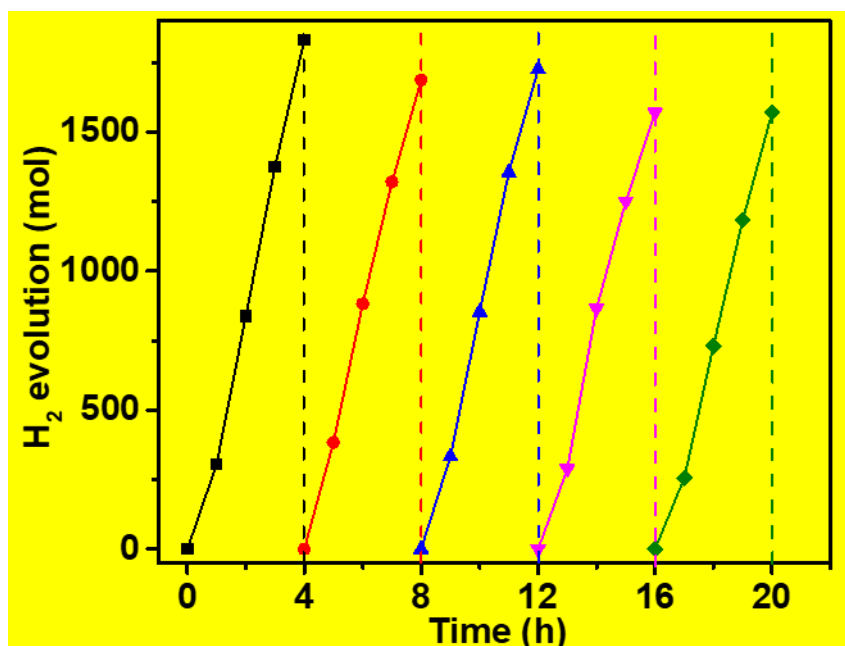

**Figure S42.** Cyclic stability of the PHE of TPG-75-20G with deionized water up to 5 cycles.

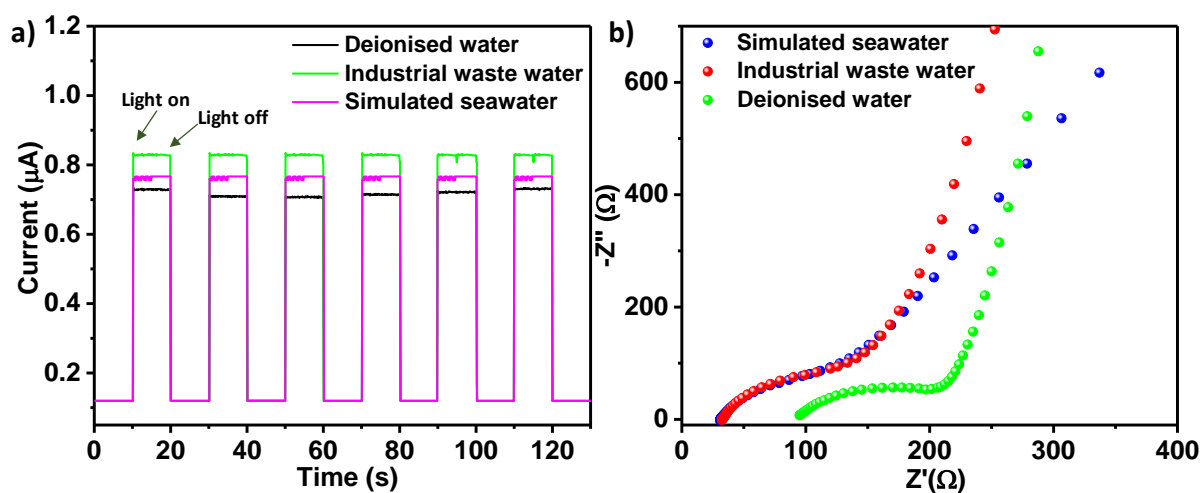

**Figure S43.** a) Photocurrent response and b) EIS studies of TPG-75-20G in water sources.

## Tables

**Table S1.** Steps followed for the synthesis of **TPG-75-20G**.

| <b>Sr. No</b> | <b>Step</b>                                                                | <b>rpm</b> | <b>Time (minutes)</b> |
|---------------|----------------------------------------------------------------------------|------------|-----------------------|
| 1.            | <b>PTSA+ Pa</b>                                                            | 1500       | 10                    |
| 2.            | <b>Tp</b>                                                                  | 1500       | 10                    |
| 3.            | <b>H<sub>2</sub>O (20 mL)</b>                                              | 1000       | 10                    |
| 4.            | <b>gC<sub>3</sub>N<sub>4</sub> (0.5 part) + H<sub>2</sub>O<br/>(30 mL)</b> | 1000       | 10                    |
| 5.            | <b>gC<sub>3</sub>N<sub>4</sub> (0.5 part)</b>                              | 1000       | 10                    |
| 6.            | <b>H<sub>2</sub>O (5 mL)</b>                                               | 1000       | 10                    |
| 7.            | <b>--</b>                                                                  | 1000       | 10                    |
| 8.            | <b>--</b>                                                                  | 1000       | 5                     |

**Table S2.** Comparison of HER reported for different 2D polymer organic photocatalyst and their performance.

| Sr. No | COF                                   | Co-Catalyst       | SED                   | solvent                        | Irradiation | Activity ( $\mu\text{mol/g/h}$ ) | AQE                              | Ref                                                        |
|--------|---------------------------------------|-------------------|-----------------------|--------------------------------|-------------|----------------------------------|----------------------------------|------------------------------------------------------------|
| 1.     | TPG-75                                | PVP-Pt NP         | Ascorbic acid         | H <sub>2</sub> O               | 420         | 86,246                           | 10.4 % at 450 nm                 | Our work                                                   |
| 2.     | TPG-75                                | PVP-Pt NP         | Ascorbic acid         | H <sub>2</sub> O               | AM 1.5      | 1,79,064                         |                                  | Our work                                                   |
| 3.     | TFPT-COF (20 mg)                      |                   | 10 vol% TEOA          | H <sub>2</sub> O               | >420        | 1,970                            | 2.2-3.9 % at 500 nm              | <i>Chem. Sci.</i> <b>2014</b> , 5, 2789-2793               |
| 4.     | N <sub>2</sub> COF (5 mg)             | Co-1 <sup>b</sup> | 0.075 M TEOA (pH=8)   | 4:1 CAN/H <sub>2</sub> O       | AM 1.5      | 782                              | 0.16 % at 400 nm                 | <i>J. Am. Chem. Soc.</i> <b>2017</b> , 139, 16228-16234    |
| 5.     | FS-COF+WS5F (5 mg)                    | 8 % Pt            | Ascorbic acid         | Water                          | >400 nm     | 16,300                           | 0.6 % at 600                     | <i>Nat. Chem.</i> <b>2018</b> , 10, 1180-1189              |
| 6.     | Sp <sup>2</sup> -COF <sub>ERDN</sub>  | 3 % Pt            | 10 vol% TEOA          | H <sub>2</sub> O               | >400 nm     | 2,120                            | -                                | <i>Chem</i> <b>2019</b> , 5, 1632-1647                     |
| 7.     | A-TEBPY-COF (10 mg)                   | 3 Wt% Pt          | 10 vol% TEOA          | Phosphate buffer               | AM 1.5      | 98                               | -                                | <i>Adv. Energy Mater.</i> <b>2018</b> , 8, 1703278         |
| 8.     | N <sub>3</sub> COF (5 mg)             | 3 Wt% Pt          | 0.074 M TEOA (pH=7)   | Phosphate buffer               | >420 nm     | 1,703                            | 0.44 % at 450 nm                 | <i>Nat. Comm.</i> <b>2015</b> , 6, 8508                    |
| 9.     | TP-BDDA COF (10 mg)                   | 3 % Pt            | 10 vol% TEOA          | H <sub>2</sub> O               | >395 nm     | 330                              | 1.3 % at 420 nm; 1.8 % at 520 nm | <i>J. Am. Chem. Soc.</i> <b>2018</b> , 140, 1423-1427.     |
| 10.    | TP-COF                                | 6 % Pt            | 0.054 M Ascorbic acid | H <sub>2</sub> O               | >400 nm     | 8,420                            | 0.4 % at 475 nm                  | <i>Angew. Chem. Int. Ed.</i> <b>2019</b> , 58, 18290-18294 |
| 11.    | g-C <sub>54</sub> N <sub>6</sub> -COF | 3 wt% Pt          | 10 mL TEOA            | H <sub>2</sub> O               | 420 nm      | 25,189                           |                                  | <i>Angew. Chem. Int. Ed.</i> <b>2020</b> , 59, 23845-23853 |
| 12.    | COF-alkene                            | 3 wt% Pt          | TEOA                  | H <sub>2</sub> O               | 420 nm      | 2,330                            | 6.7 % at 420 nm                  | <i>Adv. Sci.</i> <b>2020</b> , 7, 1902988                  |
| 13.    | PyTA-BC                               | 7.4 wt% Pt        | Ascorbic acid         | H <sub>2</sub> O with Methanol | 420         | 5,030                            | 1.46 % at 420 nm                 | <i>Adv. Optical Mater.</i> <b>2020</b> , 2000641           |
| 14.    | BtCOF150                              | 1 wt% Pt          | TEOA                  | H <sub>2</sub> O               | 420         | 750                              | 0.2 % at 420 nm                  | <i>J. Am. Chem. Soc.</i> <b>2020</b> , 142, 9752-9762      |
| 15.    | NKCOF-108                             | 5 wt% Pt          | Ascorbic acid         | H <sub>2</sub> O               | 420         | 12,000                           | 2.96% at 520 nm                  | <i>ACS Catal.</i> <b>2021</b> , 11, 2098-2107              |
| 16.    | Tp-2C/BPy <sup>2+</sup> -COF          | 3 wt% Pt          | Ascorbic acid         | H <sub>2</sub> O               | 420         | 34,600                           | 6.93% at 420                     | <i>Angew. Chem. Int. Ed.</i> <b>2021</b> , 60, 9642-9649   |
| 17.    | TtaTfa                                | 8 wt% Pt          | Ascorbic acid         | H <sub>2</sub> O               | 420         | 20,700                           | 1.43 % at 450 nm                 | <i>Angew. Chem. Int. Ed.</i> <b>2021</b> , 60, 19797-19803 |
| 18.    | BDF-TAPT-COF (10mg)                   | 8 wt% Pt          | Ascorbic acid         | H <sub>2</sub> O               | AM 1.5      | 1,390                            | 7.8 % at 420 nm                  | <i>Chem. Commun.</i> , <b>2021</b> , 57, 4464-4467         |
| 19.    | ZnPor-DETH-COF (2.5 mg)               | 8 wt% Pt          | TEOA                  | Phosphate buffer               | 420         | 413                              | 0.063% at 450                    | <i>Nat. Commun.</i> , 12, <b>2021</b> , 1354.              |
| 20.    | TTAN-COF                              | 3 wt% Pt          | Ascorbic acid         | H <sub>2</sub> O               | 420         | 11,940                           |                                  | <i>ACS Catal.</i> <b>2022</b> , 12, 10718-10726            |
| 21.    | Tz-COF-3 (10 mg)                      | 3 wt% Pt          | Ascorbic acid         | H <sub>2</sub> O               | 420         | 43,200                           | 6.9% at 420                      | <i>ACS Catal.</i> <b>2022</b> , 12, 9494-9502              |
| 22.    | BDTCTF-1 (20 mg)                      | 3 wt% Pt          | TEOA                  | H <sub>2</sub> O               | 420         | 4,500                            | 3.9% at 420                      | <i>ACS Appl. Energy Mater.</i> <b>2023</b> , 6, 930-938    |
| 23.    | Tp-2C/BPy <sup>2+</sup> -COF          | 3 wt% Pt          | Ascorbic acid         | H <sub>2</sub> O               | 420         | 34,600                           | 6.93% at 420                     | <i>Angew. Chem. Int. Ed.</i> <b>2021</b> , 60, 9642-9649   |



|     |                                                                          |             |                          |                      |         |                                             |                   |                                                             |
|-----|--------------------------------------------------------------------------|-------------|--------------------------|----------------------|---------|---------------------------------------------|-------------------|-------------------------------------------------------------|
| 24. | COF-923-AC (5 mg)                                                        | 3 wt% Pt    | Ascorbic acid            | H <sub>2</sub> O     | 350     | 23,400                                      | 0.68% at 450      | Angew. Chem. Int. Ed. <b>2023</b> , 62, e202216073          |
| 25. | COF-JLU100 (5mg)                                                         | 12 wt% Pt   | TEOA                     | H <sub>2</sub> O     | 420     | 1,07,380                                    | 4.27% at 420      | Angew. Chem. <b>2022</b> , e202208919                       |
| 26. | PY-DHBD-COF (10 mg)                                                      | 3 wt% Pt    | Ascorbic acid            | H <sub>2</sub> O     | 420     | 71,160                                      | 8.4% at 420       | Nat. Commun., 13, <b>2022</b> , 1355.                       |
| 27. | TpPa(Δ)-Cu(II)-COF/L-cysteine                                            | -           | L cysteine               | H <sub>2</sub> O     | 420     | 14,720                                      | 0.78% at 600      | Nat. Commun., 13, <b>2022</b> , 5768.                       |
| 28. | TpPa-1-COF (10mg)                                                        | Ni12P5      | Ascorbic acid            | H <sub>2</sub> O     | 420     | 3,160                                       | -                 | Small, <b>2022</b> , 18, 2201340                            |
| 29. | BTT-BPy-PCOF(AC) (10 mg)                                                 | 3 wt% Pt    | Ascorbic acid            | H <sub>2</sub> O     | 420     | 15,800                                      | 3.06 % at 450     | Angew. Chem.Int. Ed. <b>2023</b> , 62, e202300224           |
| 30. | TP-COF (5 mg)                                                            | 8 wt % Pt   | TEOA                     | H <sub>2</sub> O     | 420     | 29,120                                      | 13.48 % at 450    | Sci. China Mater., <b>2023</b> , 66, 2283-2289              |
| 31. | COF-JLU35 (5 mg)                                                         | 1 wt% Pt    | Ascorbic acid            | H <sub>2</sub> O     | 420     | 70,800                                      | 3.21 % at 500     | J. Am. Chem. Soc. <b>2023</b> , 145, 8364-8374              |
| 32. | TpBpy-Ni2% (10 mg)                                                       | 3 wt% Pt    | Ascorbic acid            | H <sub>2</sub> O     | 420     | 72,800                                      | 5.3 % at 475      | Angew. Chem.Int. Ed. <b>2023</b> , 135, e202217527          |
| 33. | 1 wt % Pd @ CTF-N                                                        | 1 wt% Pd    | 10 mL TEOA               | H <sub>2</sub> O     | 420 nm  | 10,556                                      |                   | ACS Appl. Mater. Interfaces, <b>2020</b> , 12, 12774–12782  |
| 34. | CTF-7 (5 mg)                                                             | 1 wt% Pd    | 10 mL TEOA               | H <sub>2</sub> O     | 420     | 9,240                                       |                   | Chem. Commun., 2022, 58, 92-95                              |
| 35. | T3N-CTF                                                                  | 3 wt% Pt    | TEOA                     | H <sub>2</sub> O     | 420     | 6,485                                       | 12.2% at 405      | Chem.Sus.Chem., <b>2022</b> , 15, e202200828                |
| 36. | CTF-NWU-1                                                                | 3 wt% Pt    | TEOA                     | H <sub>2</sub> O     | 420     | 17,600                                      | 0.20 % at 420     | J. Mater. Chem. A, <b>2022</b> , 10, 16328-16336            |
| 37. | BDTCTF- 1 (20 mg)                                                        | 3 wt% Pt    | TEOA                     | H <sub>2</sub> O     | 420     | 4,500                                       | 3.9 % at 420      | ACS Appl. Energy Mater. <b>2023</b> , 6, 930-938            |
| 38. | NH <sub>2</sub> -UiO-66/TpPa-1-COF (10 mg)                               | 3 % Pt      | Sodium Ascorbate         | Phosphate buffer     | >420 nm | 23,410                                      | -                 | Angew. Chem. Int. Ed. <b>2018</b> , 57, 12106-12110         |
| 39. | NH <sub>2</sub> -UiO-66/TpPa-1-COF                                       | 3 wt% Pt    | Ascorbic acid            | Buffer (PH 7)        | 420     | 14,228                                      | 9.75 % at 500     | J. Am. Chem. Soc. <b>2020</b> , 142, 4862-4871              |
| 40. | a-Fe2O3/TpPa-2-COF (3 : 7)                                               | -           | Sodium Ascorbate         | H <sub>2</sub> O     | 420     | 3,770                                       | 0.137 % at 450 nm | J. Mater. Chem. A, <b>2020</b> , 8, 4334-4340               |
| 41. | rGO(5%)-TpPa-1-COF                                                       | 3 wt% Pt    | Sodium ascorbate         | H <sub>2</sub> O     | 420     | 11,980                                      | 7.53 % at 450 nm  | J. Mater. Chem. A, <b>2020</b> , 8, 8949-8956               |
| 42. | CTF-1/GO-3.0 (10 mg)                                                     | 3 wt% Pt    | TEOA                     | H <sub>2</sub> O     | 420     | 2262                                        | -                 | Chem. Eur. J. <b>2021</b> , 27, 13059–13066                 |
| 43. | 2.5-TBTA/g-C3N4                                                          | 2.08 wt% Pt | Ascorbic acid            | H <sub>2</sub> O     | 420     | 26,040                                      | -                 | Catal. Sci. Technol., <b>2021</b> , 11, 2616-2621           |
| 44. | Pd0.033/TPTTA/SiO2                                                       | Pd          | Ascorbic acid            | H <sub>2</sub> O     | 420     | 156 mmol <sup>-1</sup> h <sup>-1</sup> gCOF | 7.3% at 420       | ACS Appl. Mater. Interfaces, <b>2022</b> , 14, 5, 6885-6893 |
| 45. | Zn@HTpPa (10 mg)                                                         | 3 wt% Pt    | Sodium ascorbate         | Phosphate buffer     | 420     | 28,000                                      | -                 | Chem. Cat. Chem., <b>2022</b> , 14, e202101800              |
| 46. | ZT-5 (10 mg)                                                             | -           | 10 vol% furfuryl alcohol | H <sub>2</sub> O     | 420     | 9,730                                       | 13.91 % at 500    | J. Mater. Chem. A, <b>2022</b> , 10, 22531-22539            |
| 47. | TT-TAB (1 mg)                                                            | 3 wt% Pt    | Ascorbic acid            | H <sub>2</sub> O     | 395     | 1,13,900                                    | 4.48% at 415      | DOI:10.26434/chemrxiv-2021-q1b4b-v2                         |
| 48. | P2CNNS (20 mg)                                                           | -           | Ascorbic acid            | H <sub>2</sub> O/DMF | 420     | 50,200                                      | -                 | Applied Surface Science, <b>2023</b> , 615, 156414          |
| 49. | [Mo <sub>3</sub> S <sub>13</sub> ] <sub>2</sub> -@ZnP-Pz-PEO-COF (10 mg) | -           | 15 vol% lactic acid      | H <sub>2</sub> O     | 420     | 11,000                                      | 3.6 % at 600      | Nat. Commun., <b>2023</b> , 14, 329                         |



|     |                                                   |            |                  |                            |     |        |               |                                                         |
|-----|---------------------------------------------------|------------|------------------|----------------------------|-----|--------|---------------|---------------------------------------------------------|
| 50. | Mo <sub>3</sub> S <sub>13</sub> @EB-COF           |            | Ascorbic acid    | DMF/H <sub>2</sub> O (1:1) | 420 | 13,215 | 4.49 % at 475 | <i>Chem. Commun.</i> , <b>2018</b> , 54, 13563–13566.   |
| 51. | MoS <sub>2</sub> -3%/TpPa-1-COF                   |            | Ascorbic acid    | H <sub>2</sub> O           | 420 | 5,580  | 0.76 % at 420 | <i>J. Mater. Chem. A</i> , <b>2019</b> , 7, 20193–20200 |
| 52. | MOF-808@TpPa-1-COF(6/4)                           | 3 wt% Pt   | Sodium Ascorbate | H <sub>2</sub> O           | 420 | 11,800 |               | <i>J. Mater. Chem. A</i> , <b>2021</b> , 9, 16743–16750 |
| 53. | 30%PEG@BT-COF                                     | 5 wt% Pt   | Ascorbic acid    | H <sub>2</sub> O           | 420 | 11,140 | 11.2 % at 420 | <i>Nat. Commun.</i> , <b>2021</b> , 12, 3934            |
| 54. | 12.5% Ni <sub>12</sub> P <sub>5</sub> /TpPa 1-COF |            | Ascorbic acid    | H <sub>2</sub> O           | 420 | 3,160  |               | <i>Small</i> , <b>2022</b> , 18, 2201340                |
| 55. | MTV-Ti-MOF/COF                                    | 1.2 wt% Pt | Ascorbic acid    | PBS Buffer                 | 420 | 13,980 | 5.9% at 515   | <i>Angew.Chem.Int.Ed.</i> <b>2022</b> ,61,e202114071    |
| 56. | TiO <sub>2</sub> -x/TpPa-1-COF (6:4)              | 3 wt% Pt   | Sodium Ascorbate | PBS Buffer                 | 420 | 15,330 | 6.7% at 420   | <i>Chem. Eng. J.</i> , <b>2022</b> , 446,137213         |
| 57. | PTCOF-OID                                         | 3 wt% Pt   | Sodium Ascorbate | H <sub>2</sub> O           | 420 | 29,290 | 2.51% at 420  | <i>Adv. Funct. Mater.</i> <b>2023</b> ,33, 2307300      |
| 58. | Cu <sub>2</sub> O/PyTTA-TPA COFs                  |            | Methanol         | H <sub>2</sub> O           | 420 | 12,500 | 21.5% at 475  | <i>ACS Nano</i> , <b>2023</b> , 17, 5994–6001           |

**Table S3.** Types of water and properties.

| No | Type of Water         | Composition                                                                                                                                           | pH   |
|----|-----------------------|-------------------------------------------------------------------------------------------------------------------------------------------------------|------|
| 1  | Deionized water       | Pure                                                                                                                                                  | 7.79 |
| 2  | Simulated seawater    | NaCl, MgCl <sub>2</sub> , MgSO <sub>4</sub> , CaSO <sub>4</sub> , K <sub>2</sub> SO <sub>4</sub> , K <sub>2</sub> CO <sub>3</sub> , MgBr <sub>2</sub> | 7.79 |
| 3  | Industrial wastewater | Formic acid, propionic acid, butyric acid                                                                                                             | 3.26 |
| 4  | Processed seawater    | Chloride, sulphate, iron, sodium, silicon, potassium, magnesium, calcium, copper                                                                      | 7.65 |

**Table S4.** Photoluminescence emission properties of gC<sub>3</sub>N<sub>4</sub>, Tp-Pa, and TPG-75.

| Catalyst                       | Lifetime (ns) | Contribution (%) | CHISQ |
|--------------------------------|---------------|------------------|-------|
| gC <sub>3</sub> N <sub>4</sub> | 7.7           | 44.86            | 1.22  |
|                                | 42.1          | 17.6             |       |
|                                | 1.9           | 37.54            |       |
| TPG-75                         | 0.53          | 73.31            | 1.09  |
|                                | 3.66          | 26.69            |       |
| Tp-Pa                          | 0.18          | 100              | 1.03  |

**Table S5.** Photoluminescence emission properties of  $\text{gC}_3\text{N}_4$ , and  $\text{gC}_3\text{N}_4$  mixed with different ratios of **Tp-Pa**.

| Catalyst                                  | Lifetime (ns) | Contribution (%) | CHISQ |
|-------------------------------------------|---------------|------------------|-------|
| $\text{gC}_3\text{N}_4$                   | 7.7           | 44.86            | 1.22  |
|                                           | 42.1          | 17.6             |       |
|                                           | 1.9           | 37.54            |       |
| $\text{gC}_3\text{N}_4$ :Tp-Pa::100:0.1   | 6.7           | 44.06            | 1.18  |
|                                           | 43.02         | 13.46            |       |
|                                           | 1.57          | 42.48            |       |
| $\text{gC}_3\text{N}_4$ :Tp-Pa<br>100:0.5 | 6.65          | 44.02            | 1.22  |
|                                           | 41.2          | 13.56            |       |
|                                           | 1.53          | 42.42            |       |
| $\text{gC}_3\text{N}_4$ :Tp-Pa<br>100:1   | 6.8           | 46.58            | 1.22  |
|                                           | 43.07         | 14.48            |       |
|                                           | 1.59          | 38.94            |       |
| $\text{gC}_3\text{N}_4$ :Tp-Pa<br>100:5   | 5.8           | 45.66            | 1.12  |
|                                           | 38.62         | 13.29            |       |
|                                           | 1.24          | 41.05            |       |

**Table S6.** Comparison of HER reported for different photocatalyst and their performance from seawater.

| Sr. No | Catalyst                  | Co-Catalyst        | SED                                       | solvent              | Irradiation           | Activity ( $\mu\text{mol/g/h}$ ) | Reference                                                          |
|--------|---------------------------|--------------------|-------------------------------------------|----------------------|-----------------------|----------------------------------|--------------------------------------------------------------------|
| 1.     | TPG-75                    | PVP-Pt NP          | Ascorbic acid                             | $\text{H}_2\text{O}$ | 420                   | 1,09,125                         | Our work                                                           |
| 2.     | COP-TP <sub>3:1</sub>     | 3 wt% Pt           | TEOA                                      | 3wt% NaCl            | 420                   | 5200                             | <i>ACS Appl. Mater. Interfaces.</i> <b>2018</b> , 10, 30698–30705  |
| 3.     | COP-TF@CNi <sub>2</sub> P | CNi <sub>2</sub> P | 0.2 M Na <sub>2</sub> S/NaSO <sub>3</sub> | seawater             | 400                   | 2500                             | <i>ACS Appl. Mater. Interfaces</i> , <b>2019</b> , 11, 41313-41320 |
| 4.     | PFNH-Br                   |                    | triethylamine                             | seawater             | Simulated solar light | 1806                             | <i>Adv. Energy Sustainability Res.</i> <b>2022</b> , 3, 2200068    |
| 5.     | Tp-Pa                     | 0.5Wt% Pt          | 0.1M Ascorbic acid                        | Simulated seawater   | 420                   | 41,300                           | <i>Nano Research</i> , <b>2023</b> , 16, 6251-6259                 |
| 6.     | TTR-COF                   | Au                 | Triethanolamine                           | seawater             | 420                   | 141                              | <i>ACS Sustainable Chem. Eng.</i> , <b>2019</b> , 7, 18574-18581   |
| 7.     | $\text{gC}_3\text{N}_4$   | Pt                 | Glycerol                                  | seawater             | Simulated solar light | 847                              | <i>Int. J. Hydrogen Energy</i> <b>2018</b> , 43, 14925-14933.      |
| 8.     | PorFn                     | Pt                 | TEOA                                      | 0.5M NaCl            | 420                   | 10,800                           | <i>Adv. Funct. Mater.</i> <b>2019</b> , 29, 1808156                |
| 9.     | CTF-HUST-3                |                    | TEOA                                      | 3wt% NaCl            | Visible light         | 812                              | <i>Chem. Mater.</i> <b>2021</b> , 33, 1994-2003                    |

|     |                                                                           |                                |                                                    |                    |               |        |                                                                       |
|-----|---------------------------------------------------------------------------|--------------------------------|----------------------------------------------------|--------------------|---------------|--------|-----------------------------------------------------------------------|
| 10. | <b>o-CND-2</b>                                                            |                                | TEOA                                               | seawater           | 420           | 19,700 | <i>J. Am. Chem. Soc.</i> <b>2021</b> , <i>143</i> , 20122-20132       |
| 11. | <b>V<sub>Ti</sub>-TiO<sub>2</sub></b>                                     | 0.75 wt% Pt                    | Methanol                                           | Simulated seawater | 420           | 25,900 | <i>Chemistry</i> <b>2021</b> , <i>27</i> , 14202-14208.               |
| 12. | <b>ZnS<sub>1-x</sub>-<sub>0.5y</sub>O<sub>x</sub>(OH)<sub>y</sub>-ZnO</b> |                                | Na <sub>2</sub> SO <sub>3</sub> /Na <sub>2</sub> S | 3mol/L NaCl        | Visible light | 18.3   | <i>Int. J. Hydrogen Energy</i> <b>2011</b> , <i>36</i> , 10565-10573  |
| 13. | <b>SiO<sub>2</sub>/Ag@TiO<sub>2</sub></b>                                 |                                | Glycerol                                           | Simulated seawater | 365           | 800    | <i>Energy Environ. Sci.</i> , <b>2016</b> , <i>9</i> , 3151-3160      |
| 14. | <b>Pt-TiO<sub>2</sub></b>                                                 | Pt                             | Methanol                                           | seawater           | 320           | 1,573  | <i>Catal. Commun.</i> <b>2018</b> , <i>114</i> , 124-128.             |
| 15. | <b>CDs/CdS-S</b>                                                          | CD                             | 10 % Lactic acid                                   | seawater           | 420           | 4,660  | <i>Appl. Catal., B</i> <b>2019</b> , <i>242</i> , 178-185             |
| 16. | <b>Ti-O-Si (400)</b>                                                      | /                              | 10 vol% TEOA                                       | 5 wt% NaCl         | solar light   | 1930.5 | <i>Nanoscale</i> , <b>2018</b> , <i>10</i> , 2275-2284.               |
| 17. | <b>WS<sub>2</sub>/C-TiO<sub>2</sub>/g-C<sub>3</sub>N<sub>4</sub></b>      | 3 wt% Pt                       | 10 vol% triethanolamine                            | seawater           | 420           | 1200   | <i>ChemSusChem.</i> , <b>2018</b> , <i>11</i> , 4077-4085             |
| 18. | <b>H-CoS/CdS-2</b>                                                        |                                | Na <sub>2</sub> S/Na <sub>2</sub> SO <sub>3</sub>  | Simulated seawater | 420           | 143.1  | <i>Int. J. Hydrogen Energy</i> , <b>2022</b> , <i>47</i> , 9220-9229. |
| 19. | <b>Ti<sub>3</sub>C<sub>2</sub>/Cd<sub>0.5</sub>Zn<sub>0.5</sub>S</b>      | Ti <sub>3</sub> C <sub>2</sub> | Na <sub>2</sub> SO <sub>3</sub> /Na <sub>2</sub> S |                    | 420           | 9071   | <i>Appl. Mater. Today</i> , <b>2021</b> , <i>22</i> , 100926.         |
| 20. | <b>P-8CE</b>                                                              | Pt                             | TEA                                                | Natural seawater   | 420           | 38,900 | <i>Adv. Energy Mater.</i> <b>2023</b> , 2300986                       |

## References

- S1 Kresse, G.; Furthmüller, J. Efficiency of Ab-Initio Total Energy Calculations for Metals and Semiconductors Using a Plane-Wave Basis Set. *Comput. Mater. Sci.* **1996**, *6* (1), 15–50.
- S2 Perdew, J. P.; Burke, K.; Ernzerhof, M. Generalized Gradient Approximation Made Simple. *Phys. Rev. Lett.* **1996**, *77* (18), 3865–3868.
- S3 Grimme, S. Semiempirical GGA-type Density Functional Constructed with a Long-range Dispersion Correction. *J Comput. Chem.* **2006**, *27* (15), 1787–1799.
- S4 Huang, C.; Illiassou, B.; T-Raissi, A.; Muradov, N. Preparation of High Efficiency Visible Light Activated Pt/CdS Photocatalyst for Solar Hydrogen Production; Guo, J., Ed.; San Diego, CA, 2007; p 665010.
- S5 Martin, D. J.; Qiu, K.; Shevlin, S. A.; Handoko, A. D.; Chen, X.; Guo, Z.; Tang, J. Highly Efficient Photocatalytic H<sub>2</sub> Evolution from Water Using Visible Light and Structure-Controlled Graphitic Carbon Nitride. *Angew. Chem. Int. Ed.* **2014**, *53* (35), 9240–9245.
